# Supplementary material
Source: PubMed Central journal article supplement (PMC8023225)
Supplement: NIHMS1683389-supplement-HeffernICSI.pdf [file NIHMS1683389-supplement-HeffernICSI.pdf]

Supplemental Information for

**Elucidation of a copper binding site in proinsulin C-peptide and its implications on metal-modulated activity**

Michael J. Stevenson, Samuel E. Janisse, Lizhi Tao, Ryan L. Neil, Quang D. Pham, R. David Britt, Marie C. Heffern\*

Department of Chemistry, University of California, Davis, Davis, CA 95616

\*Corresponding author: mcheffern@ucdavis.edu

**Table of Contents**

|             |                                                                                |    |
|-------------|--------------------------------------------------------------------------------|----|
| Figure S1.  | NMR spectra of metal competition for C-peptide                                 | 1  |
| Figure S2.  | NMR spectra of C-peptide with sub-stoichiometric addition of Cu(II)            | 2  |
| Figure S3.  | <sup>1</sup> H- <sup>1</sup> H TOCSY and NOESY spectra of C-peptide            | 3  |
| Figure S4.  | Δδ plots of NH and CHα for Zn(II)/C-peptide and Cu(II)/C-peptide               | 4  |
| Figure S5.  | Δδ plots of side chains for Zn(II)/C-peptide and Cu(II)/C-peptide              | 5  |
| Figure S6.  | Second derivative of FTIR spectra for apo and Cu(II)/C-peptide                 | 6  |
| Figure S7.  | Representative thermogram of Cu(II) titrated into C-peptide (MOPSO)            | 7  |
| Figure S8.  | Analysis to determine proton displacement on C-peptide                         | 8  |
| Figure S9.  | Representative thermograms of Zn(II) titrated into C-peptide                   | 9  |
| Figure S10. | First derivatives of UV-Vis spectra of Cu(II)-bound C-peptide variants         | 10 |
| Figure S11. | Δδ plots of NH and CHα for metal-bound E3A/D4A C-peptide                       | 11 |
| Figure S12. | Δδ plots of side chains for metal-bound E3A/D4A C-peptide                      | 12 |
| Figure S13. | Representative thermograms of Cu(II) titrated into E3A/D4A C-peptide           | 13 |
| Figure S14. | CW EPR spectra of Cu(II)-bound C-peptide, N-term, and C-term                   | 14 |
| Figure S15. | HYSCORE spectra of Cu(II)-bound C-peptide, N-term, and C-term                  | 15 |
| Figure S16. | <sup>1</sup> H NMR spectra of apo and Cu(II)/N-term                            | 16 |
| Figure S17. | <sup>1</sup> H NMR spectra of apo and Cu(II)/C-term                            | 17 |
| Figure S18. | Representative thermograms of Cu(II) titrated into N-term and C-term           | 18 |
| Table S1.   | Chemical shifts of <sup>1</sup> H resonances of apo C-peptide                  | 19 |
| Table S2.   | Chemical shifts of <sup>1</sup> H resonances of Zn(II)/C-peptide               | 20 |
| Table S3.   | Chemical shifts of <sup>1</sup> H resonances of Cu(II)/C-peptide               | 21 |
| Table S4.   | Δδ of assigned <sup>1</sup> H resonances of Zn(II)/C-peptide and apo C-peptide | 22 |
| Table S5.   | Δδ of assigned <sup>1</sup> H resonances of Cu(II)/C-peptide and apo C-peptide | 23 |
| Table S6.   | ITC experimental fit parameters                                                | 24 |
| Table S7.   | Chemical shifts of <sup>1</sup> H resonances of apo E3A/D4A C-peptide          | 25 |
| Table S8.   | Chemical shifts of <sup>1</sup> H resonances of Cu(II)-bound E3A/D4A C-peptide | 26 |
| Table S9.   | Δδ of assigned <sup>1</sup> H resonances of Cu(II) and apo E3A/D4A C-peptide   | 27 |
| Table S10.  | ITC fit and buffer-independent parameters for C-peptide variants               | 28 |
| Scheme S1.  | Determination of ΔH <sub>Cu(II)-MOPSO</sub>                                    | 29 |
| References  |                                                                                | 30 |

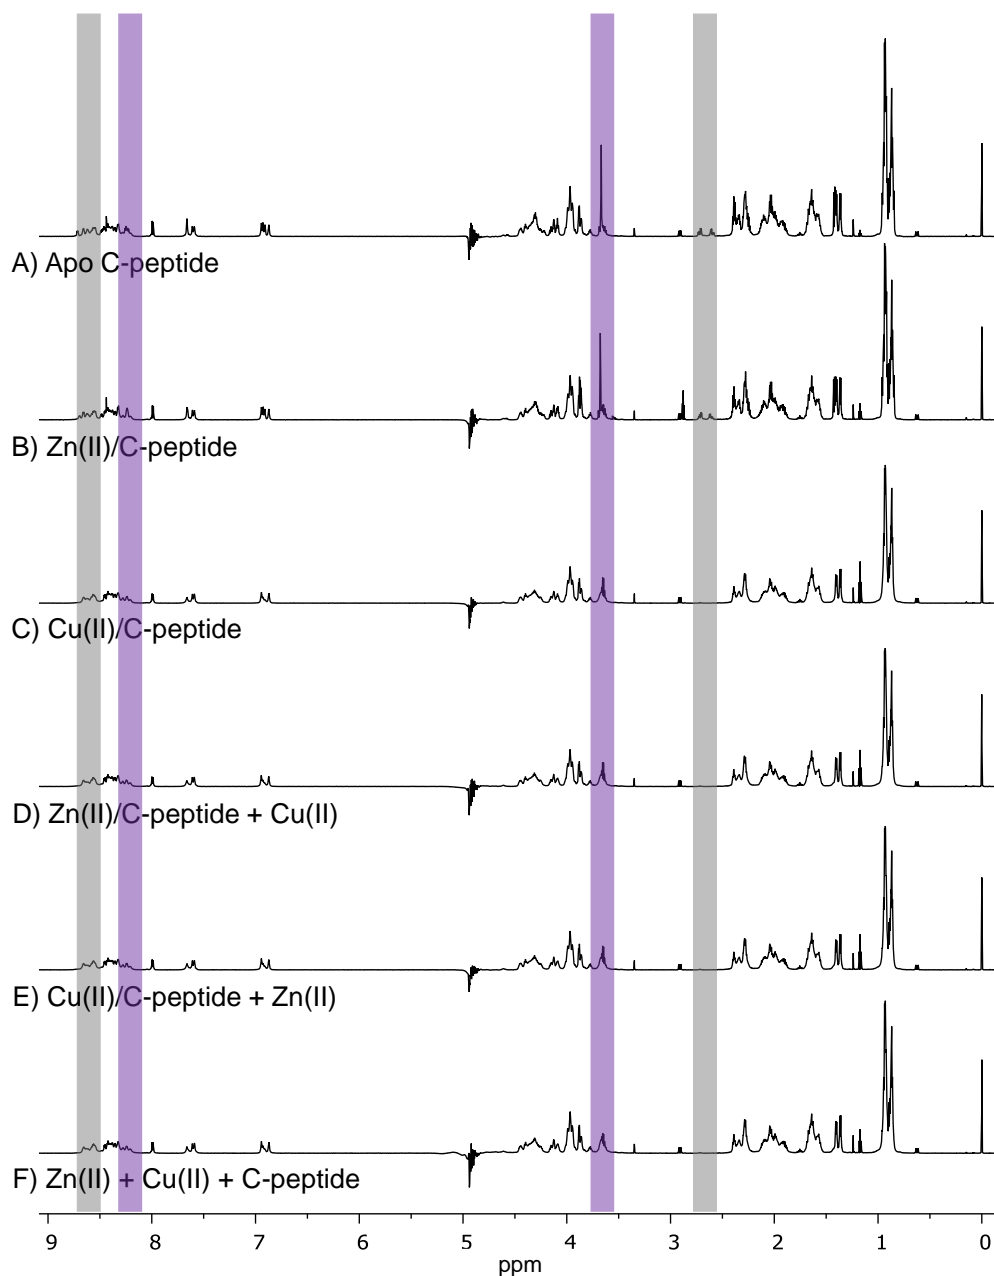

**Figure S1.**  $^1\text{H}$  NMR spectra of A) apo C-peptide, B) Zn(II)/C-peptide, C) Cu(II)/C-peptide, D) equimolar Cu(II) added to Zn(II)/C-peptide, E) equimolar Zn(II) added to Cu(II)/C-peptide, and F) Cu(II) and Zn(II) added to apo C-peptide simultaneously. Grey highlighted regions of spectra are enlarged and shown in Figure 3 and are due to  $\text{CH}\beta$  protons on D4 (2.7 ppm) and backbone amide protons from E3 (8.7 ppm). Purple highlighted regions of the spectra are due to glycine protons (3.7 ppm) and the backbone amide proton from L5 (8.2 ppm). All spectra were collected at 800 MHz in 95:5  $\text{H}_2\text{O}:\text{D}_2\text{O}$  and 10 mM Tris- $\text{d}_{11}$ , pH 7.4 at 10  $^\circ\text{C}$ . Addition of Zn(II) induces shifts in proton resonances while Cu(II) obliterates proton resonances within these regions. The spectra of Cu(II) competition with Zn(II) (D, E, and F) result in spectra that resemble Cu(II)/C-peptide and not Zn(II)/C-peptide indicating that Cu(II) displaces Zn(II) for binding C-peptide.

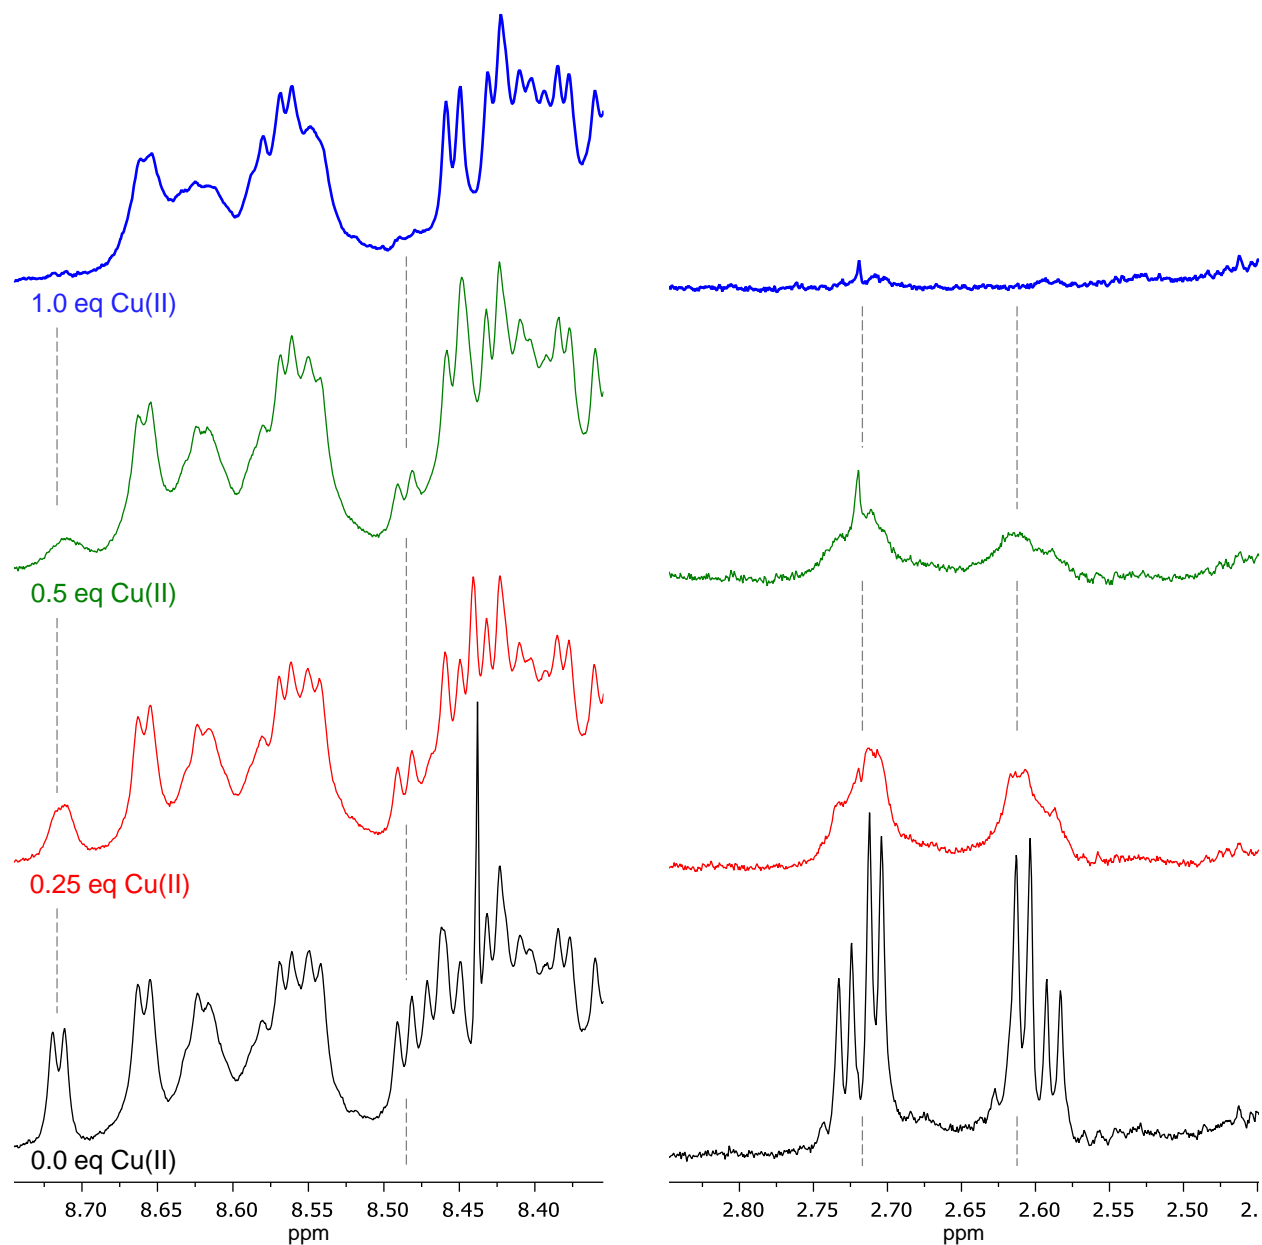

**Figure S2.** NMR spectra of 250  $\mu\text{M}$  apo C-peptide (black) and 250  $\mu\text{M}$  C-peptide with 62.5  $\mu\text{M}$  (red), 125  $\mu\text{M}$  (green), and 250  $\mu\text{M}$  (blue) Cu(II). Cu(II) obliterates the proton resonances of CH $\beta$  protons on D4 (2.6 ppm) and backbone amide protons from D4 (8.45 ppm) and E3 (8.7 ppm) (dashed lines). Solutions were prepared in 95:5 (v/v) H $_2$ O:D $_2$ O with 10 mM Tris-d $_{11}$  at pH 7.4 and spectra were collected at 800 MHz and 10  $^{\circ}\text{C}$ .

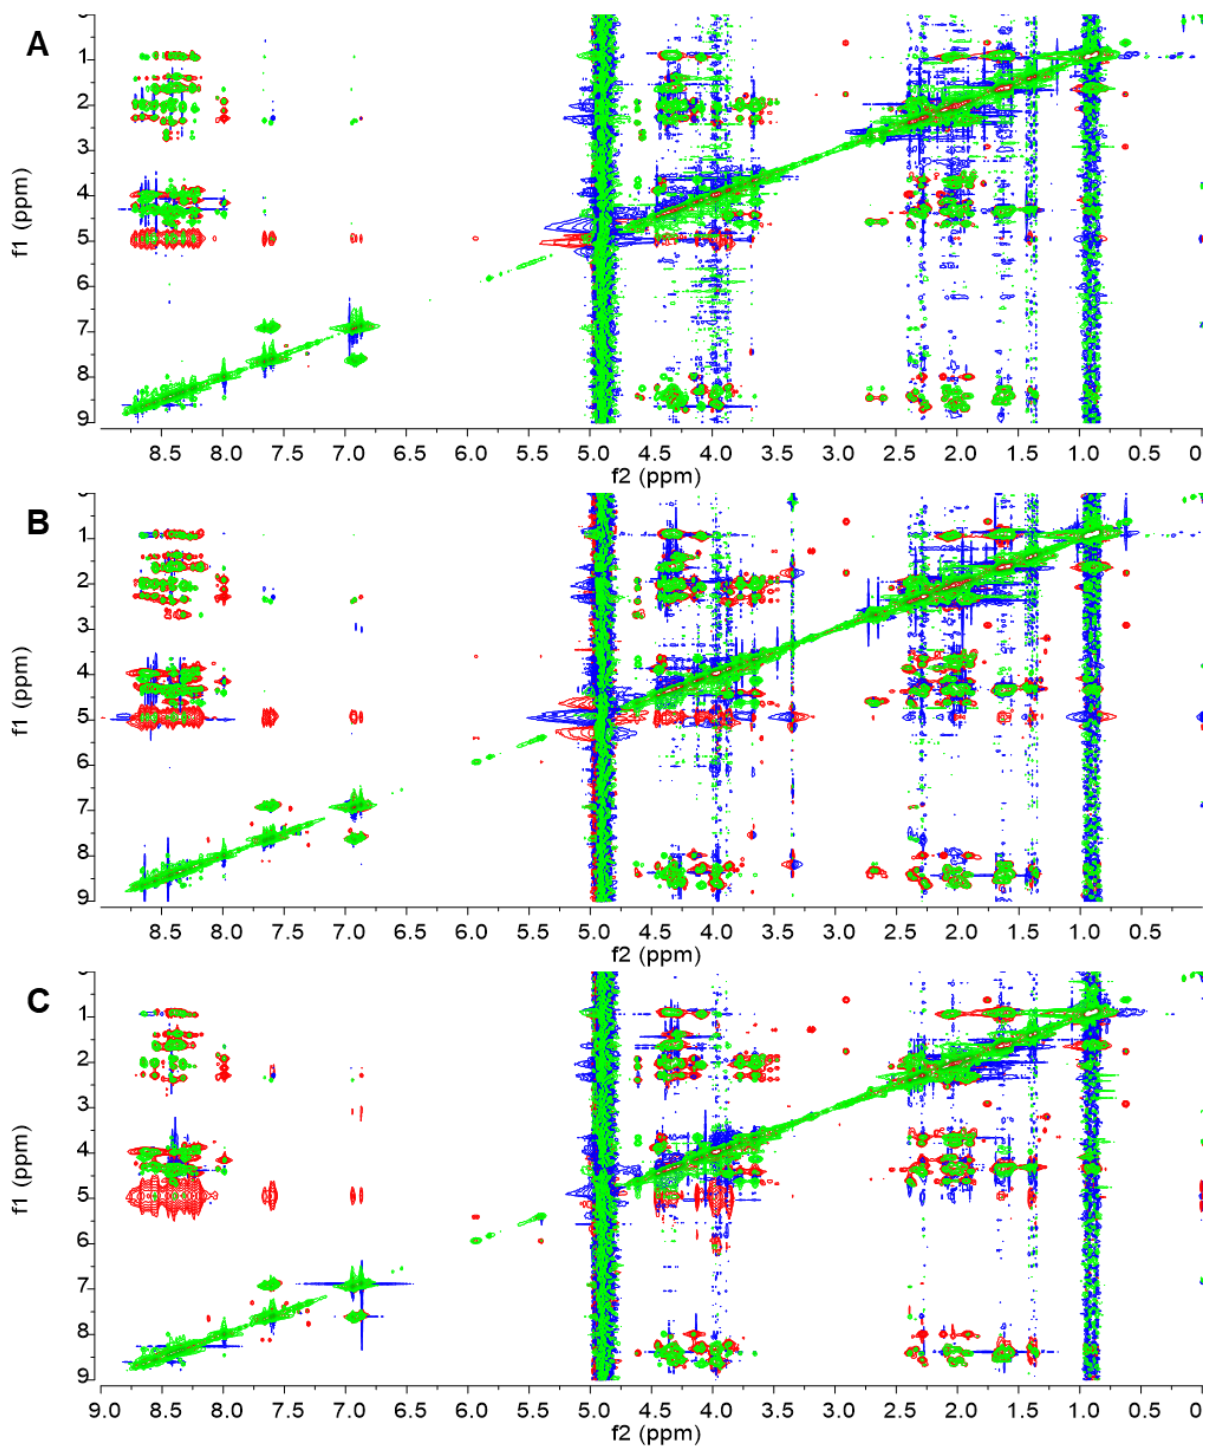

**Figure S3.** Overlay of full  $^1\text{H}$ - $^1\text{H}$  TOCSY (red-blue) and  $^1\text{H}$ - $^1\text{H}$  NOESY (green-blue) spectra for 1.5 mM A) apo C-peptide, B) Zn(II)/C-peptide, and C) Cu(II)/C-peptide. All spectra were collected at 800 MHz in 95:5  $\text{H}_2\text{O}:\text{D}_2\text{O}$  and 10 mM Tris- $\text{d}_{11}$ , pH 7.4 at 10  $^\circ\text{C}$ .

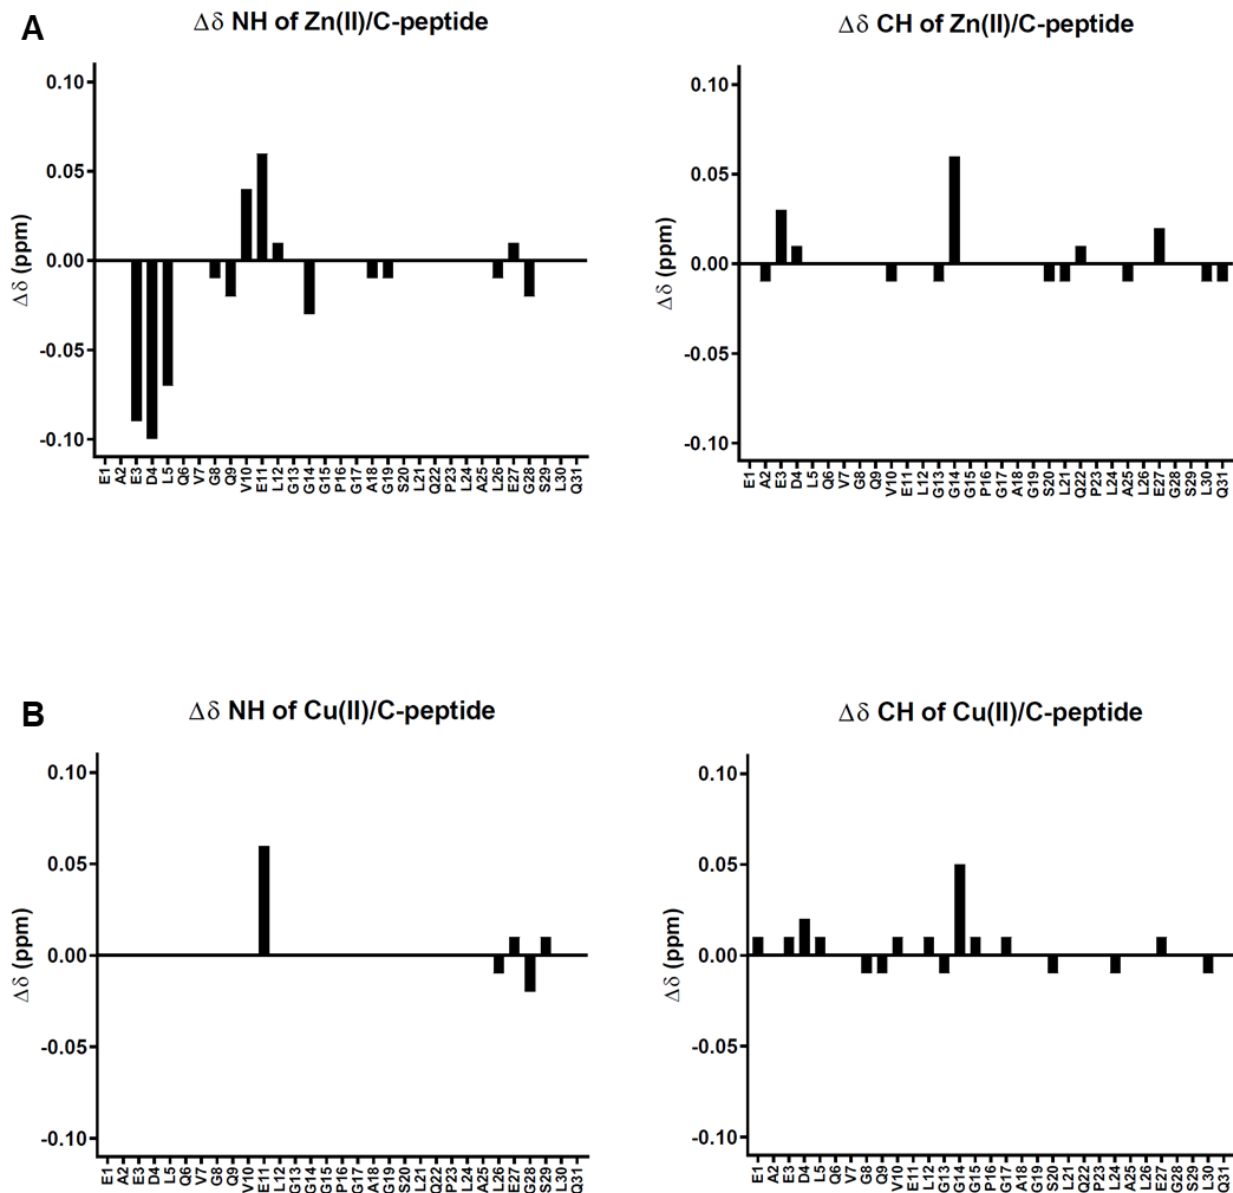

**Figure S4.** The  $\Delta\delta$  ( $\delta(M^{2+}/C\text{-peptide}) - \delta(\text{apo } C\text{-peptide})$ ) of  $^1\text{H}$  chemical shifts (ppm) of the backbone amide (NH) and  $\text{CH}\alpha$  protons plotted against C-peptide sequence for A) Zn(II)/C-peptide and B) Cu(II)/C-peptide.  $\Delta\delta$  plots for the backbone side chain protons are shown in Figure S5. Solutions were prepared at 1.5 mM peptide in 95:5 (v/v)  $\text{H}_2\text{O}:\text{D}_2\text{O}$  with 10 mM Tris- $\text{d}_{11}$  at pH 7.4 and spectra were collected at 800 MHz and 10  $^\circ\text{C}$ . The  $\Delta\delta$  of NH for E3, D4, L5, V10, and E11 show significant effects on the  $^1\text{H}$  resonances compared with other NH protons and indicate a possible location of metal binding.  $^1\text{H}$  chemical shift assignments are tabulated in Table S1-S5.

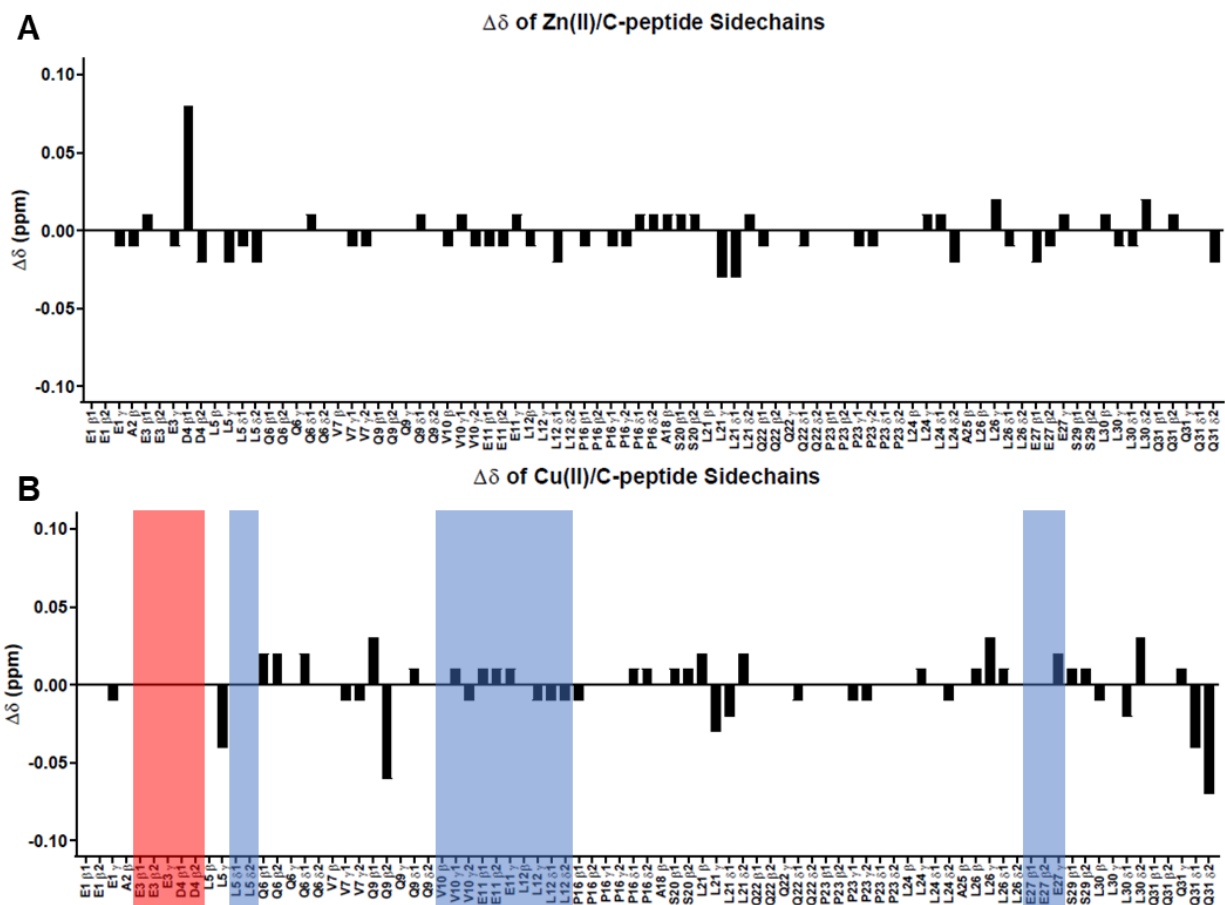

**Figure S5.** The  $\Delta\delta$  ( $\delta(M^{2+}/C\text{-peptide}) - \delta(\text{apo WT } C\text{-peptide})$ ) of  $^1\text{H}$  chemical shifts (ppm) of amino acid side chains plotted against WT C-peptide sequence for A) Zn(II)/C-peptide and B) Cu(II)/C-peptide.  $\Delta\delta$  plots for the backbone amide and  $\text{CH}\alpha$  protons are shown in Figure S4. Solutions were prepared at 1.5 mM peptide in 95:5 (v/v)  $\text{H}_2\text{O}:\text{D}_2\text{O}$  with 10 mM Tris- $\text{d}_{11}$  at pH 7.4 and spectra were collected at 800 MHz and 10 °C. The proton resonances with shading indicate reduced (blue) or obliterated (red) intensities. Coordination by Zn(II) on D4 and by Cu(II) on E3 and D4 show significant effects on the  $^1\text{H}$  resonances compared with other amino acid protons and indicate location of metal binding.  $^1\text{H}$  chemical shift assignments are tabulated in Tables S1-S5.

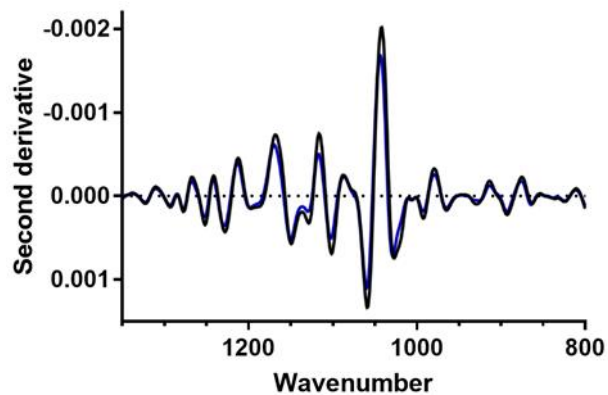

**Figure S6.** Second derivative FTIR spectra of WT C-peptide (black) and Cu(II)/C-peptide (blue) at low wavenumbers. The second derivative patterns between apo and Cu(II)-bound peptides are similar in this region indicating that the stretching and bending frequencies of serine are not affected by Cu(II).

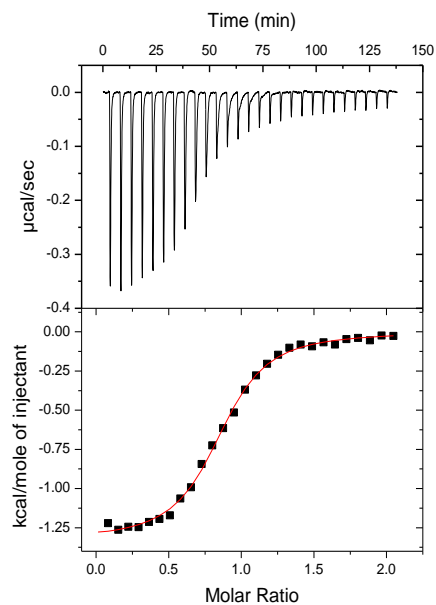

**Figure S7.** Representative thermogram of 1.0 mM Cu(II) titrated into 100  $\mu\text{M}$  C-peptide in 15 mM MOPSO, pH 7.4 with red fit line:  $n = 0.852 \pm 0.006$ ;  $K_{\text{ITC}} = 3.0 (\pm 0.2) \times 10^5$ ;  $\Delta H_{\text{ITC}} = -1.33 \pm 0.01 \text{ kcal mol}^{-1}$ . Buffer-independent thermodynamics are summarized in Table 2 and indicate a predominantly entropic driving force.



### Deprotonation of C-peptide upon Cu(II) binding

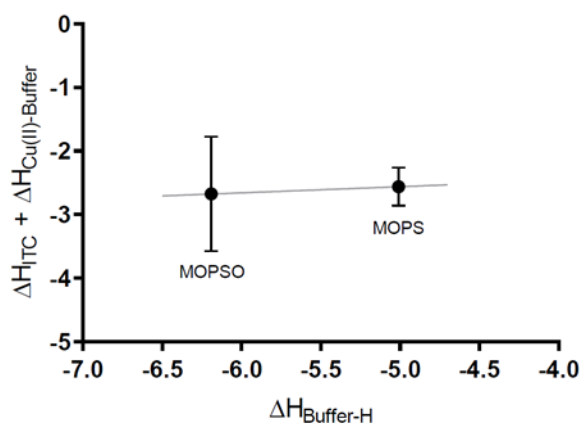

**Figure S8.** Analysis to determine the number of protons that are displaced from C-peptide upon Cu(II) binding. Protonation plot of  $\Delta H_{ITC} + \Delta H_{Cu(II)-Buffer}$  vs.  $\Delta H_{Buffer-H}$  has a slope equal to the number of protons as detailed by Grosseohme *et al.*<sup>1</sup> that are binding to the buffer and is equal to  $0.1 \pm 0.2$ . The error of the slope is estimated from subtraction of the minimum slope from the maximum slope between the error bars divided by two.

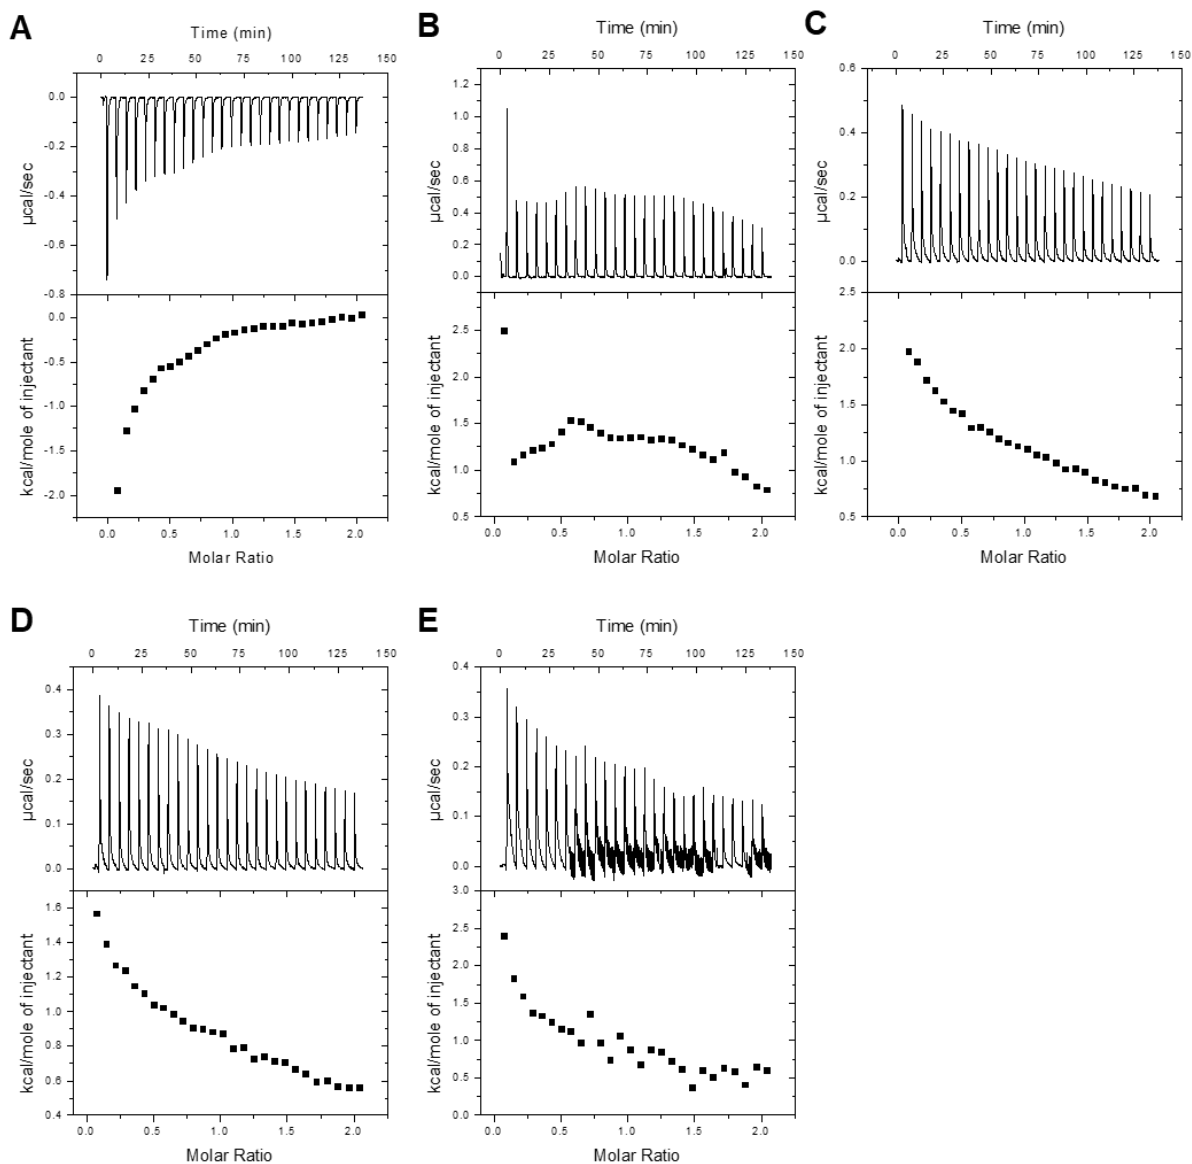

**Figure S9.** Representative thermograms of 1.0 mM Zn(II) titrated into 100  $\mu$ M C-peptide in A) 15 mM Tris, pH 7.4, B) 15 mM bisTris, pH 7.4, C) 15 mM MOPS, pH 7.4, D) 15 mM MOPSO, pH 7.4, and E) 15 mM PIPES, pH 7.4. The titrations were inconsistent, do not indicate specific Zn(II)-binding, and are most likely from heat of dilution from the Zn(II) titration into the cell.

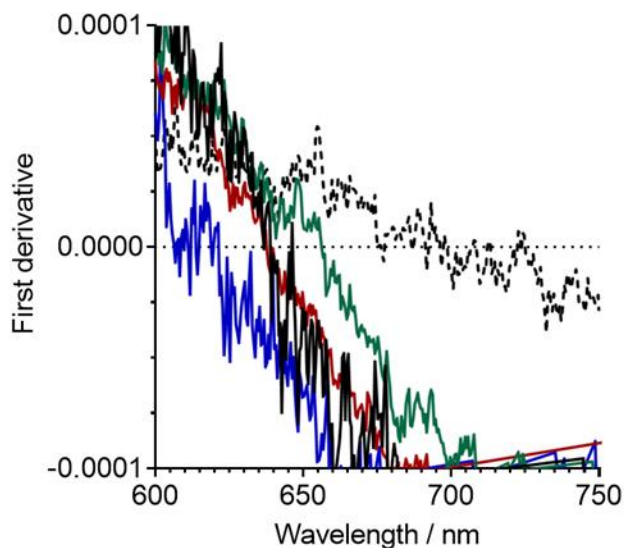

**Figure S10.** First derivatives of the spectra shown in Figure 7 corresponding to WT C-peptide (black), E3A C-peptide (red), D4A C-peptide (blue), E3A D4A C-peptide (green), and Cu(II) in 15 mM MOPS, pH 7.4 (black, dashed).  $\lambda_{\max}$  for the d-d band as determined by the first derivative of WT, E3A, D4A, E3A D4A C-peptide, and Cu(II) in buffer are 638, 637, 620, 658, and 696 nm, respectively. Derivatives of spectra were processed by a 20-point smoothing. The similar energy of the d-d band from Cu(II) suggests that the Cu(II) is bound to similar ligands in all peptides. The  $\lambda_{\max}$  of E3A D4A C-peptide is red-shifted, is most similar to buffer alone, and exhibits the largest change in  $\lambda_{\max}$  among the mutants relative to WT C-peptide.

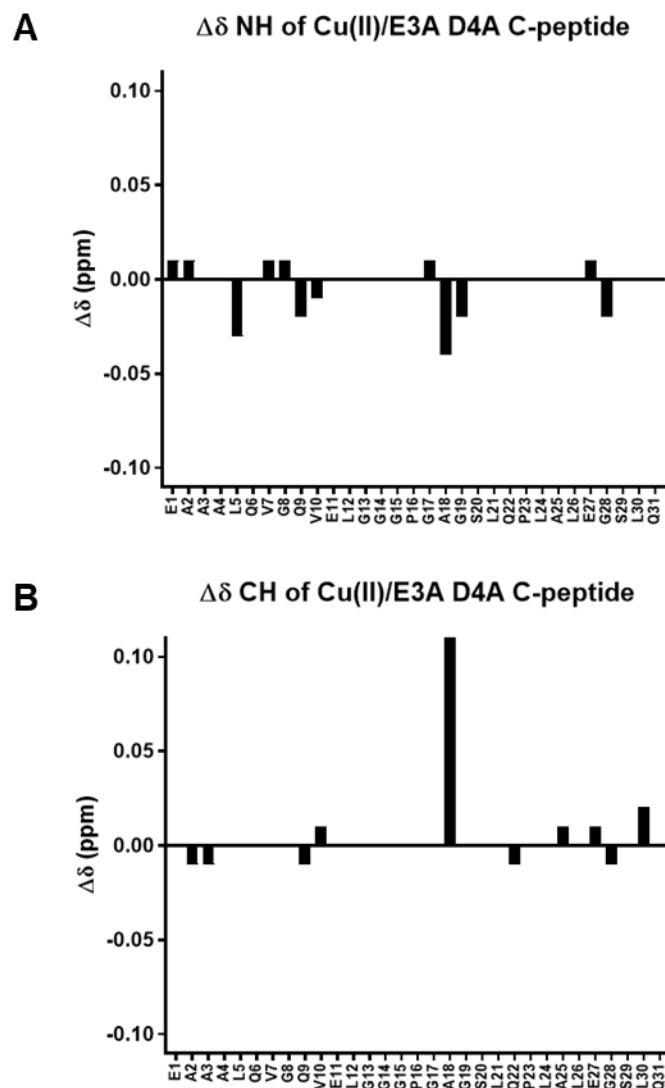

**Figure S11.** The  $\Delta\delta$  ( $\delta(\text{Cu(II)/E3A D4A C-peptide}) - \delta(\text{apo E3A D4A C-peptide})$ ) of  $^1\text{H}$  chemical shifts (ppm) of the A) backbone amide (NH) and B)  $\text{CH}\alpha$  protons plotted against peptide sequence. Solutions were prepared at 1.5 mM peptide in 95:5 (v/v)  $\text{H}_2\text{O}:\text{D}_2\text{O}$  with 10 mM Tris- $\text{d}_{11}$  at pH 7.4 and spectra were collected at 800 MHz and 10 °C.  $\Delta\delta$  plots for the backbone side chain protons are shown in Figure S12. The small  $\Delta\delta$  indicate minimal changes in peptide structure upon Cu(II) binding.  $^1\text{H}$  chemical shift assignments are tabulated in Tables S7-S9.

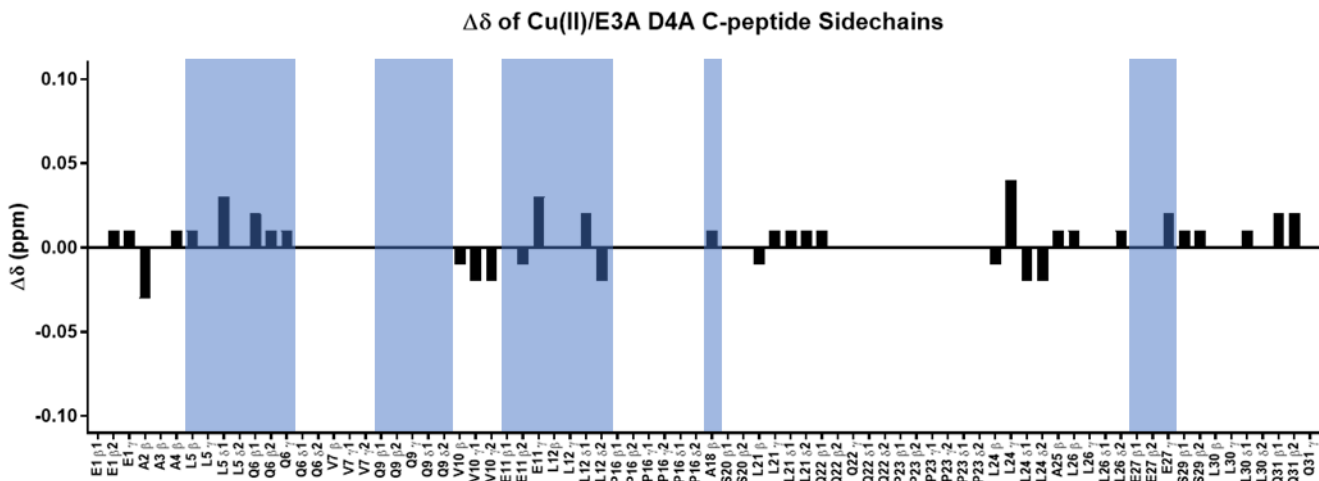

**Figure S12.** The  $\Delta\delta$  ( $\delta(\text{Cu(II)/E3A D4A C-peptide}) - \delta(\text{apo E3A D4A C-peptide})$ ) of  $^1\text{H}$  chemical shifts (ppm) of amino acid side chains plotted against peptide sequence. Solutions were prepared at 1.5 mM peptide in 95:5 (v/v)  $\text{H}_2\text{O}:\text{D}_2\text{O}$  with 10 mM Tris- $\text{d}_{11}$  at pH 7.4 and spectra were collected at 800 MHz and 10 °C.  $\Delta\delta$  plots for the backbone amide and  $\text{CH}\alpha$  protons are in the Figure S11. The proton resonances with shading indicate reduced (blue) intensities. Mutation of the Cu(II) binding site (E3 and D4) to alanines shifts Cu(II)-binding to other residues (Q6, E11, and E27) that also had reduced intensities in WT and indicate multiple modes of Cu(II) binding where the preferential is E3 and D4.  $^1\text{H}$  chemical shift assignments are tabulated in Tables S7-S9.

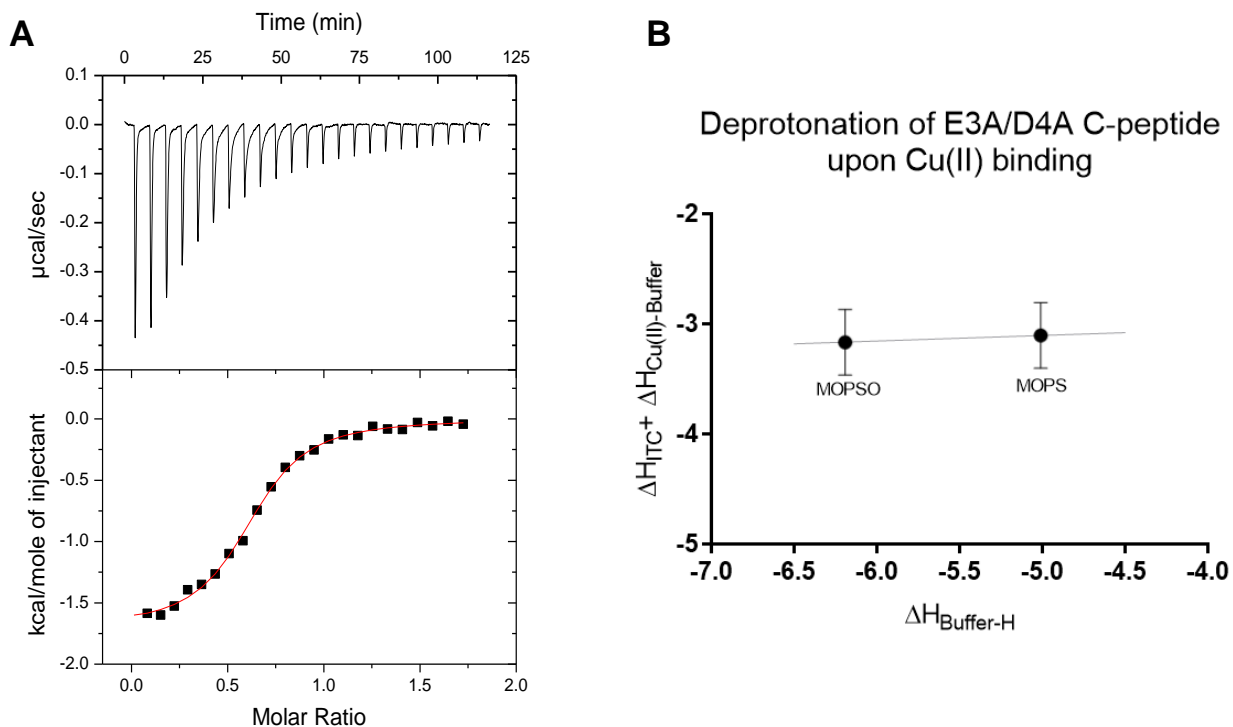

**Figure S13.** A) Representative thermogram of 1.0 mM Cu(II) titrated into 100 μM E3A/D4A C-peptide in 15 mM MOPSO, pH 7.4 with red fit line:  $n = 0.621 \pm 0.006$ ;  $K_{ITC} = 2.6 (\pm 0.2) \times 10^5$ ;  $\Delta H_{ITC} = -1.70 \pm 0.02 \text{ kcal mol}^{-1}$ . B) Protonation plot of  $\Delta H_{ITC} + \Delta H_{Cu(II)-Buffer}$  vs.  $\Delta H_{Buffer-H}$  has a slope equal to the number of protons as detailed by Grosseohme *et al.*<sup>1</sup> that are binding to the buffer and is equal to  $0.1 \pm 0.6$ . The large error of the slope is estimated from subtraction of the minimum slope from the maximum slope between the error bars divided by two. Buffer-independent thermodynamics are summarized in Table S10 and indicate a predominantly entropic driving force.

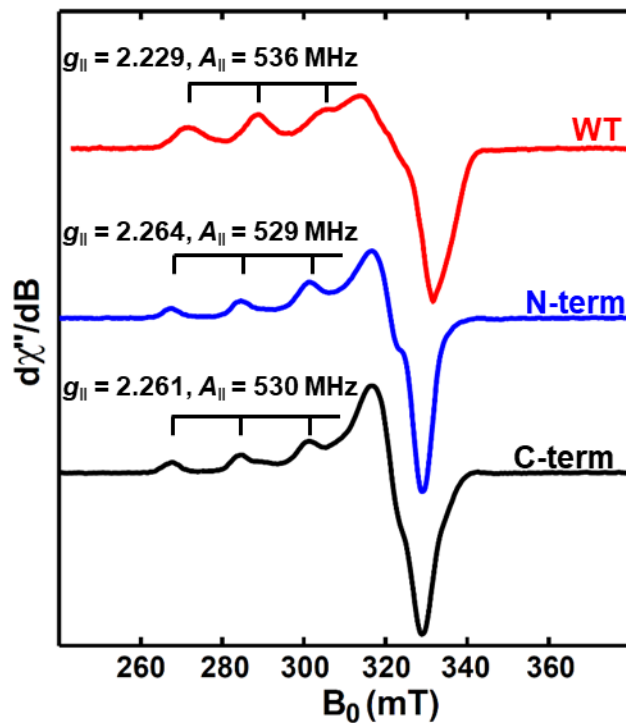

**Figure S14.** X-band EPR of Cu(II) bound to WT C-peptide (red), N-term (blue), and C-term (black) and collected at 20 K. WT C-peptide from Figure 5 is shown here for clarity of comparisons to truncations. Samples were prepared with 0.5 mM Cu(II) and 1.0 mM C-peptide in 15 mM MOPS, pH 7.4 with 20% ethylene glycol as a glassing agent. These spectra indicate that Cu(II) is bound in a square planar geometry to either 4O or 3O1N coordination.<sup>2</sup>

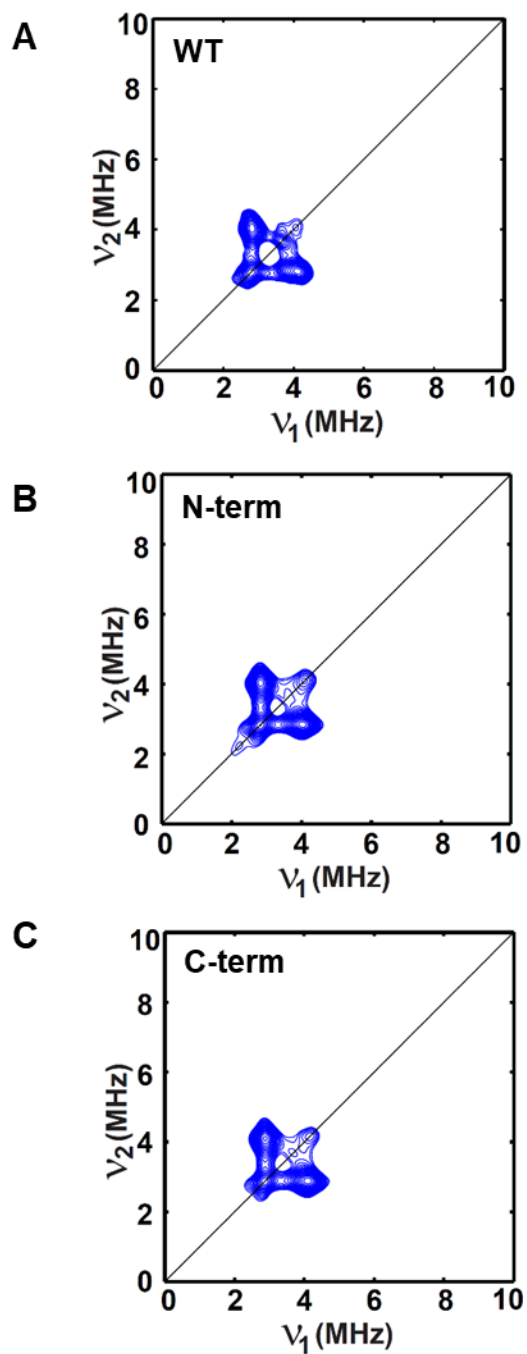

**Figure S15.** HYSCORE spectra of Cu(II) bound to A) WT C-peptide, B) N-term, and C) C-term and collected at 20 K. WT C-peptide from Figure 5 is shown here for clarity of comparisons to truncations.



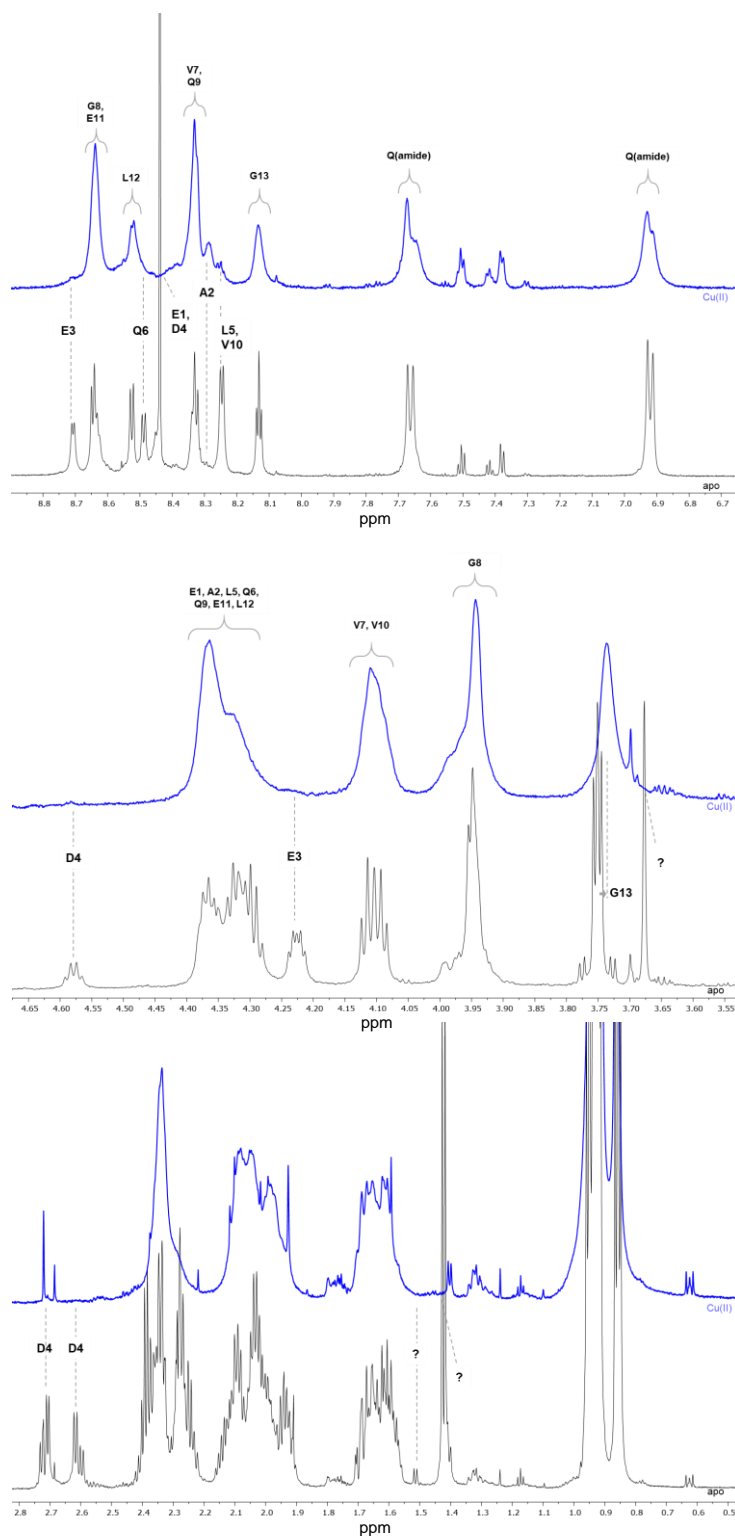

**Figure S16.** NMR spectra of apo and Cu(II) bound N-term C-peptide with assigned peaks and noted differences when Cu(II) is bound. Solutions were prepared at 1.5 mM peptide in 95:5 (v/v) H<sub>2</sub>O:D<sub>2</sub>O with 10 mM Tris-d<sub>11</sub> at pH 7.4 and spectra were collected at 800 MHz and 10 °C.

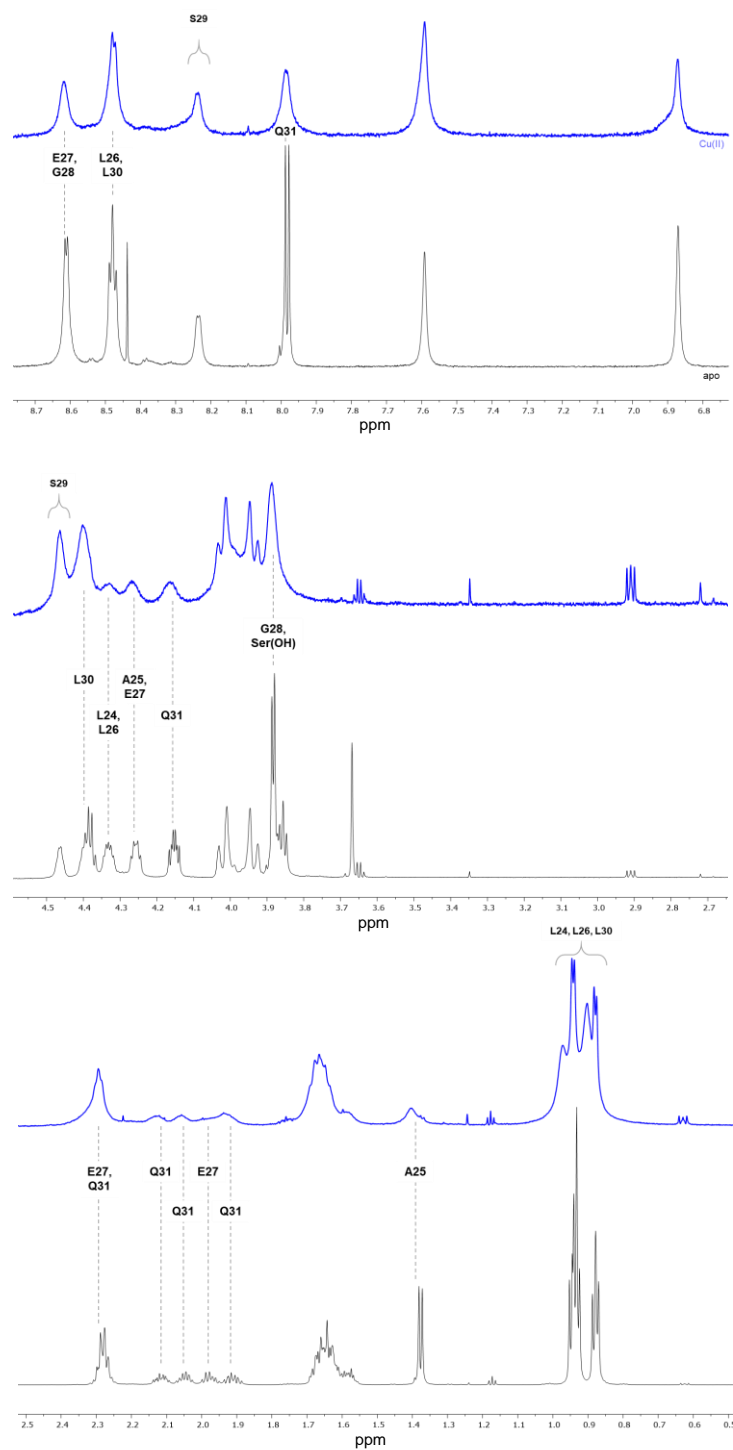

**Figure S17.** NMR spectra of apo and Cu(II) bound C-term C-peptide with assigned peaks and noted differences when Cu(II) is bound. Solutions were prepared at 1.5 mM peptide in 95:5 (v/v) H<sub>2</sub>O:D<sub>2</sub>O with 10 mM Tris-d<sub>11</sub> at pH 7.4 and spectra were collected at 10 °C.

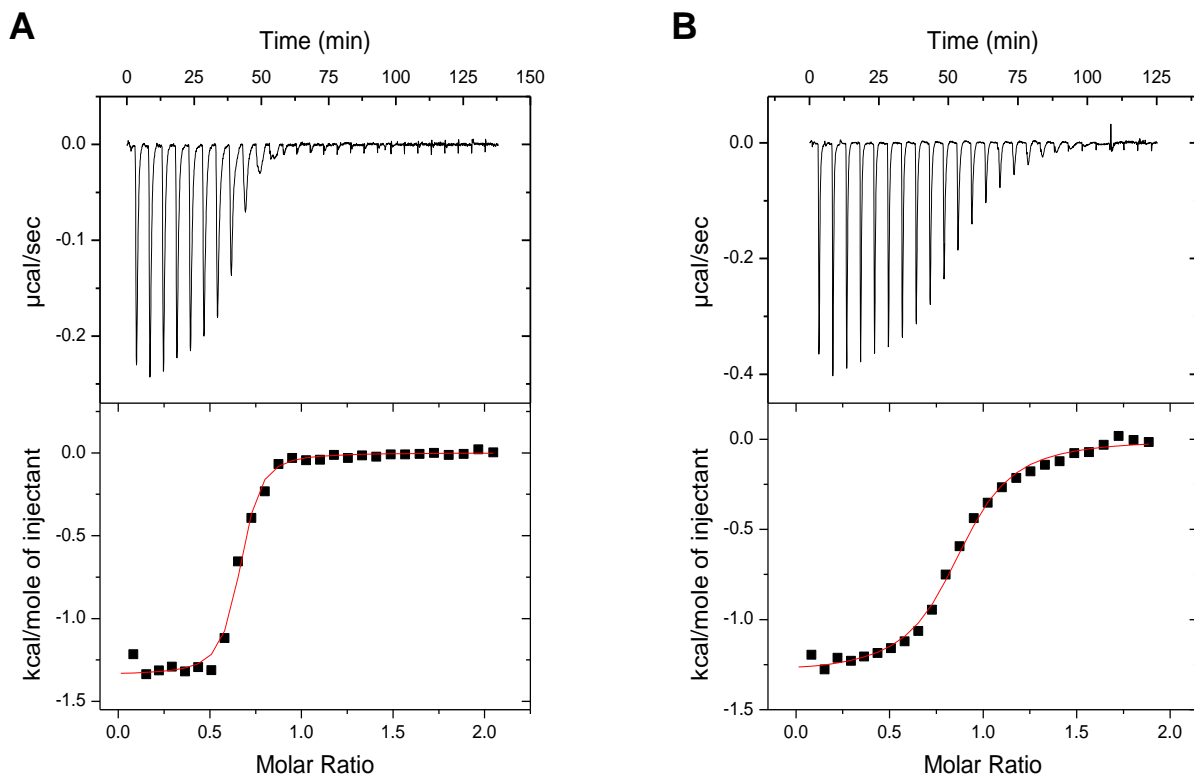

**Figure S18.** Representative thermogram of 1.0 mM Cu(II) titrated into A) 100 μM N-term and B) 100 μM C-term in 15 mM MOPSO, pH 7.4. Red fit line for A)  $n = 0.64 \pm 0.01$ ;  $K_{ITC} = 2.2 (\pm 0.5) \times 10^6$ ;  $\Delta H_{ITC} = -1.34 \pm 0.02$  kcal mol<sup>-1</sup>, and B)  $n = 0.860 \pm 0.009$ ;  $K_{ITC} = 4.0 (\pm 0.4) \times 10^5$ ;  $\Delta H_{ITC} = -1.30 \pm 0.02$  kcal mol<sup>-1</sup>. The average best fit data are summarized in Table S10.

**Table S1.** Chemical shifts of assigned proton NMR resonances of apo WT C-peptide. Solutions were prepared at 1.5 mM peptide in 95:5 (v/v) H<sub>2</sub>O:D<sub>2</sub>O with 10 mM Tris-d<sub>11</sub> at pH 7.4 and spectra were collected at 800 MHz and 10 °C.

| Chemical Shifts of Assigned <sup>1</sup> H NMR Resonances of Apo C-peptide at pH 7.4 |                                |             |            |             |             |             |
|--------------------------------------------------------------------------------------|--------------------------------|-------------|------------|-------------|-------------|-------------|
| Residue                                                                              | Chemical Shifts at 10 °C (ppm) |             |            |             |             |             |
|                                                                                      | NH                             | CH $\alpha$ | CH $\beta$ | CH $\gamma$ | CH $\delta$ | NH $\gamma$ |
| E1                                                                                   | 8.04                           | 4.34        | 1.84, 2.04 | 2.33        | -           | -           |
| A2                                                                                   | 8.38                           | 4.32        | 1.37       | -           | -           | -           |
| E3                                                                                   | 8.71                           | 4.22        | 1.94, 2.03 | 2.28        | -           | -           |
| D4                                                                                   | 8.46                           | 4.57        | 2.60, 2.72 | -           | -           | -           |
| L5                                                                                   | 8.25                           | 4.31        | 1.64       | 1.62        | 0.86, 0.93  | -           |
| Q6                                                                                   | 8.56                           | 4.25        | 1.98, 2.04 | 2.28        | -           | 6.86, 7.59  |
| V7                                                                                   | 8.32                           | 4.11        | 2.03       | 0.93        | -           | -           |
| G8                                                                                   | 8.62                           | 3.97        | -          | -           | -           | -           |
| Q9                                                                                   | 8.33                           | 4.36        | 2.00, 2.09 | 2.34        | -           | 6.91, 7.66  |
| V10                                                                                  | 8.23                           | 4.09        | 2.09       | 0.94, 0.96  | -           | -           |
| E11                                                                                  | 8.60                           | 4.30        | 1.93, 2.02 | 2.25        | -           | -           |
| L12                                                                                  | 8.54                           | 4.34        | 1.68       | 1.63        | 0.88, 0.91  | -           |
| G13                                                                                  | 8.40                           | 3.99        | -          | -           | -           | -           |
| G14                                                                                  | 8.39                           | 3.83        | -          | -           | -           | -           |
| G15                                                                                  | 8.58                           | 3.97        | -          | -           | -           | -           |
| P16                                                                                  | -                              | 4.40        | 1.90, 2.29 | 2.02        | 3.77        | -           |
| G17                                                                                  | 8.32                           | 3.81        | -          | -           | -           | -           |
| A18                                                                                  | 8.45                           | 3.98        | 1.35       | -           | -           | -           |
| G19                                                                                  | 8.48                           | 3.98        | -          | -           | -           | -           |
| S20                                                                                  | 8.24                           | 4.46        | 3.87       | -           | -           | -           |
| L21                                                                                  | 8.40                           | 4.37        | 1.63       | 1.63        | 0.90, 0.90  | -           |
| Q22                                                                                  | 8.41                           | 4.60        | 1.93, 2.09 | 2.39        | -           | 6.95, 7.61  |
| P23                                                                                  | -                              | 4.41        | 1.90, 2.28 | 2.03        | 3.66        | -           |
| L24                                                                                  | 8.35                           | 4.33        | 1.64       | 1.59        | 0.89, 0.93  | -           |
| A25                                                                                  | 8.28                           | 4.31        | 1.40       | -           | -           | -           |
| L26                                                                                  | 8.43                           | 4.28        | 1.64       | 1.58        | 0.90, 0.93  | -           |
| E27                                                                                  | 8.48                           | 4.33        | 2.00, 2.12 | 2.35        | -           | -           |
| G28                                                                                  | 8.67                           | 3.95        | -          | -           | -           | -           |
| S29                                                                                  | 8.20                           | 4.44        | 3.86       | -           | -           | -           |
| L30                                                                                  | 8.45                           | 4.40        | 1.66       | 1.65        | 0.90, 0.90  | -           |
| Q31                                                                                  | 7.99                           | 4.16        | 1.92, 2.12 | 2.28        | -           | 6.92, 7.66  |

**Table S2.** Chemical shifts of assigned proton NMR resonances of Zn(II)-bound WT C-peptide. Solutions were prepared at 1.5 mM peptide in 95:5 (v/v) H<sub>2</sub>O:D<sub>2</sub>O with 10 mM Tris-d<sub>11</sub> at pH 7.4 and spectra were collected at 800 MHz and 10 °C. Values in parentheses are a minor feature.

| Chemical Shifts of Assigned <sup>1</sup> H NMR Resonances of Zn(II)/C-peptide at pH 7.4 |                                |             |                   |             |             |             |
|-----------------------------------------------------------------------------------------|--------------------------------|-------------|-------------------|-------------|-------------|-------------|
| Residue                                                                                 | Chemical Shifts at 10 °C (ppm) |             |                   |             |             |             |
|                                                                                         | NH                             | CH $\alpha$ | CH $\beta$        | CH $\gamma$ | CH $\delta$ | NH $\gamma$ |
| E1                                                                                      | 8.04                           | 4.34        | 1.84, 2.04        | 2.32        | -           | -           |
| A2                                                                                      | 8.38                           | 4.31        | 1.36              | -           | -           | -           |
| E3                                                                                      | 8.62                           | 4.25        | 1.95, 2.03        | 2.27        | -           | -           |
| D4                                                                                      | 8.36 (8.32)                    | 4.58 (4.62) | 2.63, 2.70 (2.68) | -           | -           | -           |
| L5                                                                                      | 8.18                           | 4.31        | 1.64              | 1.60        | 0.85, 0.91  | -           |
| Q6                                                                                      | 8.56                           | 4.25        | 1.98, 2.04        | 2.28        | -           | 6.87, 7.59  |
| V7                                                                                      | 8.32                           | 4.11        | 2.03              | 0.92        | -           | -           |
| G8                                                                                      | 8.61                           | 3.97        | -                 | -           | -           | -           |
| Q9                                                                                      | 8.31                           | 4.36        | 2.00, 2.09        | 2.34        | -           | 6.92, 7.66  |
| V10                                                                                     | 8.27                           | 4.08        | 2.08              | 0.95        | -           | -           |
| E11                                                                                     | 8.66                           | 4.30        | 1.92, 2.01        | 2.26        | -           | -           |
| L12                                                                                     | 8.55                           | 4.34        | 1.67              | 1.63        | 0.86, 0.91  | -           |
| G13                                                                                     | 8.40                           | 3.98        | -                 | -           | -           | -           |
| G14                                                                                     | 8.36                           | 3.89        | -                 | -           | -           | -           |
| G15                                                                                     | 8.58                           | 3.97        | -                 | -           | -           | -           |
| P16                                                                                     | -                              | 4.40        | 1.89, 2.29        | 2.01        | 3.78        | -           |
| G17                                                                                     | 8.32                           | 3.81        | -                 | -           | -           | -           |
| A18                                                                                     | 8.44                           | 3.98        | 1.36              | -           | -           | -           |
| G19                                                                                     | 8.47                           | 3.98        | -                 | -           | -           | -           |
| S20                                                                                     | 8.24                           | 4.45        | 3.88              | -           | -           | -           |
| L21                                                                                     | 8.40                           | 4.36        | 1.63              | 1.60        | 0.87, 0.91  | -           |
| Q22                                                                                     | 8.41                           | 4.61        | 1.92, 2.09        | 2.39        | -           | 6.94, 7.61  |
| P23                                                                                     | -                              | 4.41        | 1.90, 2.28        | 2.02        | 3.66        | -           |
| L24                                                                                     | 8.35                           | 4.33        | 1.64              | 1.60        | 0.90, 0.91  | -           |
| A25                                                                                     | 8.28                           | 4.30        | 1.40              | -           | -           | -           |
| L26                                                                                     | 8.42                           | 4.28        | 1.64              | 1.60        | 0.89, 0.93  | -           |
| E27                                                                                     | 8.49                           | 4.35        | 1.98, 2.11        | 2.36        | -           | -           |
| G28                                                                                     | 8.65                           | 3.95        | -                 | -           | -           | -           |
| S29                                                                                     | 8.20                           | 4.44        | 3.86              | -           | -           | -           |
| L30                                                                                     | 8.45                           | 4.39        | 1.67              | 1.64        | 0.89, 0.92  | -           |
| Q31                                                                                     | 7.99                           | 4.15        | 1.92, 2.11        | 2.28        | -           | 6.92, 7.64  |

**Table S3.** Chemical shifts of assigned proton NMR resonances of Cu(II)-bound WT C-peptide. Solutions were prepared at 1.5 mM peptide in 95:5 (v/v) H<sub>2</sub>O:D<sub>2</sub>O with 10 mM Tris-d<sub>11</sub> at pH 7.4 and spectra were collected at 800 MHz and 10 °C. obl = obliterated signal; sm = reduced signal.

| Chemical Shifts of Assigned <sup>1</sup> H NMR Resonances of Cu(II)/C-peptide at pH 7.4 |                                |             |                      |             |             |             |
|-----------------------------------------------------------------------------------------|--------------------------------|-------------|----------------------|-------------|-------------|-------------|
| Residue                                                                                 | Chemical Shifts at 10 °C (ppm) |             |                      |             |             |             |
|                                                                                         | NH                             | CH $\alpha$ | CH $\beta$           | CH $\gamma$ | CH $\delta$ | NH $\gamma$ |
| E1                                                                                      | 8.04                           | 4.35        | 1.84, 2.04           | 2.32        | -           | -           |
| A2                                                                                      | 8.38                           | 4.32        | 1.37 (1.25, 1.47 sm) | -           | -           | -           |
| E3                                                                                      | 8.71                           | 4.23        | obl                  | obl         | -           | -           |
| D4                                                                                      | 8.46                           | 4.59        | obl                  | -           | -           | -           |
| L5                                                                                      | 8.25                           | 4.32        | 1.64 sm              | 1.60 sm     | obl         | -           |
| Q6                                                                                      | 8.56                           | 4.25        | 2.00, 2.06           | 2.28        | -           | 6.88, 7.59  |
| V7                                                                                      | 8.32                           | 4.11        | 2.03                 | 0.92        | -           | -           |
| G8                                                                                      | 8.62                           | 3.96        | -                    | -           | -           | -           |
| Q9                                                                                      | 8.33                           | 4.35        | 2.03, 2.03           | 2.34        | -           | 6.92, 7.66  |
| V10                                                                                     | 8.23                           | 4.10        | 2.09                 | 0.95        | -           | -           |
| E11                                                                                     | 8.66                           | 4.30        | 1.94, 2.03 sm        | 2.26 sm     | -           | -           |
| L12                                                                                     | 8.54                           | 4.35        | 1.68                 | 1.62        | 0.87, 0.92  | -           |
| G13                                                                                     | 8.40                           | 3.98        | -                    | -           | -           | -           |
| G14                                                                                     | 8.39                           | 3.88        | -                    | -           | -           | -           |
| G15                                                                                     | 8.58                           | 3.98        | -                    | -           | -           | -           |
| P16                                                                                     | -                              | 4.40        | 1.89, 2.29           | 2.02        | 3.78        | -           |
| G17                                                                                     | 8.32                           | 3.82        | -                    | -           | -           | -           |
| A18                                                                                     | 8.45                           | 3.98        | 1.35                 | -           | -           | -           |
| G19                                                                                     | 8.48                           | 3.98        | -                    | -           | -           | -           |
| S20                                                                                     | 8.24                           | 4.45        | 3.88                 | -           | -           | -           |
| L21                                                                                     | 8.40                           | 4.37        | 1.65                 | 1.60        | 0.88, 0.92  | -           |
| Q22                                                                                     | 8.41                           | 4.60        | 1.93, 2.09           | 2.39        | -           | 6.94, 7.61  |
| P23                                                                                     | -                              | 4.41        | 1.90, 2.28           | 2.02        | 3.66        | -           |
| L24                                                                                     | 8.35                           | 4.32        | 1.64                 | 1.60        | 0.89, 0.92  | -           |
| A25                                                                                     | 8.28                           | 4.31        | 1.40                 | -           | -           | -           |
| L26                                                                                     | 8.42                           | 4.28        | 1.65                 | 1.61        | 0.91, 0.93  | -           |
| E27                                                                                     | 8.49                           | 4.34        | 2.00 sm, 2.00 sm     | 2.37        | -           | -           |
| G28                                                                                     | 8.65                           | 3.95        | -                    | -           | -           | -           |
| S29                                                                                     | 8.21                           | 4.44        | 3.87                 | -           | -           | -           |
| L30                                                                                     | 8.45                           | 4.39        | 1.65                 | 1.65        | 0.88, 0.93  | -           |
| Q31                                                                                     | 7.99                           | 4.16        | 1.92, 2.12           | 2.29        | -           | 6.88, 7.59  |

**Table S4.**  $\Delta\delta$  of assigned proton NMR resonances of Zn(II)-bound WT C-peptide and apo WT C-peptide. Solutions were prepared at 1.5 mM peptide in 95:5 (v/v) H<sub>2</sub>O:D<sub>2</sub>O with 10 mM Tris-d<sub>11</sub> at pH 7.4 and spectra were collected at 800 MHz and 10 °C. Visual representations shown in Figures S4 and S5. Values in parentheses are a minor feature.

| $\Delta\delta$ of the Assigned <sup>1</sup> H NMR Resonances of Zn(II)/C-peptide at pH 7.4 |                                                                                                |             |                           |              |              |             |
|--------------------------------------------------------------------------------------------|------------------------------------------------------------------------------------------------|-------------|---------------------------|--------------|--------------|-------------|
| Residue                                                                                    | $\Delta\delta = \delta(\text{Zn(II)/C-peptide}) - \delta(\text{apo C-peptide})$ at 10 °C (ppm) |             |                           |              |              |             |
|                                                                                            | NH                                                                                             | CH $\alpha$ | CH $\beta$                | CH $\gamma$  | CH $\delta$  | NH $\gamma$ |
| E1                                                                                         | 0.00                                                                                           | 0.00        | 0.00, 0.00                | -0.01        |              |             |
| A2                                                                                         | 0.00                                                                                           | -0.01       | -0.01                     |              |              |             |
| E3                                                                                         | -0.09                                                                                          | 0.03        | 0.01, 0.00                | -0.01        |              |             |
| D4                                                                                         | -0.10 (-0.14)                                                                                  | 0.01 (0.05) | 0.03, -0.02 (0.08, -0.02) |              |              |             |
| L5                                                                                         | -0.07                                                                                          | 0.00        | 0.00                      | -0.02        | -0.01, -0.02 |             |
| Q6                                                                                         | 0.00                                                                                           | 0.00        | 0.00, 0.00                | 0.00         |              | 0.01, 0.00  |
| V7                                                                                         | 0.00                                                                                           | 0.00        | 0.00                      | -0.01, -0.01 |              |             |
| G8                                                                                         | -0.01                                                                                          | 0.00        |                           |              |              |             |
| Q9                                                                                         | -0.02                                                                                          | 0.00        | 0.00, 0.00                | 0.00         |              | 0.01, 0.00  |
| V10                                                                                        | 0.04                                                                                           | -0.01       | -0.01                     | 0.01, -0.01  |              |             |
| E11                                                                                        | 0.06                                                                                           | 0.00        | -0.01, -0.01              | 0.01         |              |             |
| L12                                                                                        | 0.01                                                                                           | 0.00        | -0.01                     | 0.00         | -0.02, 0.00  |             |
| G13                                                                                        | 0.00                                                                                           | -0.01       |                           |              |              |             |
| G14*                                                                                       | -0.03                                                                                          | 0.06        |                           |              |              |             |
| G15*                                                                                       | 0.00                                                                                           | 0.00        |                           |              |              |             |
| P16                                                                                        |                                                                                                | 0.00        | -0.01, 0.00               | -0.01        | 0.01         |             |
| G17                                                                                        | 0.00                                                                                           | 0.00        |                           |              |              |             |
| A18                                                                                        | -0.01                                                                                          | 0.00        | 0.01                      |              |              |             |
| G19                                                                                        | -0.01                                                                                          | 0.00        |                           |              |              |             |
| S20                                                                                        | 0.00                                                                                           | -0.01       | 0.01                      |              |              |             |
| L21                                                                                        | 0.00                                                                                           | -0.01       | 0.00                      | -0.03        | -0.03, 0.01  |             |
| Q22                                                                                        | 0.00                                                                                           | 0.01        | -0.01, 0.00               | 0.00         |              | -0.01, 0.00 |
| P23                                                                                        |                                                                                                | 0.00        | 0.00, 0.00                | -0.01        | 0.00         |             |
| L24                                                                                        | 0.00                                                                                           | 0.00        | 0.00                      | 0.01         | 0.01, -0.02  |             |
| A25                                                                                        | 0.00                                                                                           | -0.01       | 0.00                      |              |              |             |
| L26                                                                                        | -0.01                                                                                          | 0.00        | 0.00                      | 0.02         | -0.01, 0.00  |             |
| E27                                                                                        | 0.01                                                                                           | 0.02        | -0.02, -0.01              | 0.01         |              |             |
| G28                                                                                        | -0.02                                                                                          | 0.00        |                           |              |              |             |
| S29                                                                                        | 0.00                                                                                           | 0.00        | 0.00                      |              |              |             |
| L30                                                                                        | 0.00                                                                                           | -0.01       | 0.01                      | -0.01        | -0.01, 0.02  |             |
| Q31                                                                                        | 0.00                                                                                           | -0.01       | 0.00, 0.01                | 0.00         |              | 0.00, -0.02 |

**Table S5.**  $\Delta\delta$  of assigned proton NMR resonances of Cu(II)-bound WT C-peptide and apo WT C-peptide. Solutions were prepared at 1.5 mM peptide in 95:5 (v/v) H<sub>2</sub>O:D<sub>2</sub>O with 10 mM Tris-d<sub>11</sub> at pH 7.4 and spectra were collected at 800 MHz and 10 °C. Visual representations shown in Figures S4 and S5. obl = obliterated signal; sm = reduced signal.

| $\Delta\delta$ of the Assigned <sup>1</sup> H NMR Resonances of Cu(II)/C-peptide at pH 7.4 |                                                                                                |             |                          |              |              |              |
|--------------------------------------------------------------------------------------------|------------------------------------------------------------------------------------------------|-------------|--------------------------|--------------|--------------|--------------|
| Residue                                                                                    | $\Delta\delta = \delta(\text{Cu(II)/C-peptide}) - \delta(\text{apo C-peptide})$ at 10 °C (ppm) |             |                          |              |              |              |
|                                                                                            | NH                                                                                             | CH $\alpha$ | CH $\beta$               | CH $\gamma$  | CH $\delta$  | NH $\gamma$  |
| E1                                                                                         | 0.00                                                                                           | 0.01        | 0.00, 0.00               | -0.01        |              |              |
| A2                                                                                         | 0.00                                                                                           | 0.00        | 0.00 (-0.12 sm, 0.10 sm) |              |              |              |
| E3                                                                                         | 0.00                                                                                           | 0.01        | obl                      | obl          |              |              |
| D4                                                                                         | 0.00                                                                                           | 0.02        | obl                      |              |              |              |
| L5                                                                                         | 0.00                                                                                           | 0.01        | 0.00 sm                  | -0.04 sm     | obl          |              |
| Q6                                                                                         | 0.00                                                                                           | 0.00        | 0.02, 0.02               | 0.00         |              | 0.02, 0.00   |
| V7                                                                                         | 0.00                                                                                           | 0.00        | 0.00                     | -0.01, -0.01 |              |              |
| G8                                                                                         | 0.00                                                                                           | -0.01       |                          |              |              |              |
| Q9                                                                                         | 0.00                                                                                           | -0.01       | 0.03, -0.06              | 0.00         |              | 0.01, 0.00   |
| V10                                                                                        | 0.00                                                                                           | 0.01        | 0.00                     | 0.01, -0.01  |              |              |
| E11                                                                                        | 0.06                                                                                           | 0.00        | 0.01, 0.01 sm            | 0.01 sm      |              |              |
| L12                                                                                        | 0.00                                                                                           | 0.01        | 0.00                     | -0.01        | -0.01, -0.01 |              |
| G13                                                                                        | 0.00                                                                                           | -0.01       |                          |              |              |              |
| G14*                                                                                       | 0.00                                                                                           | 0.05        |                          |              |              |              |
| G15*                                                                                       | 0.00                                                                                           | 0.01        |                          |              |              |              |
| P16                                                                                        |                                                                                                | 0.00        | -0.01, 0.00              | 0.00         | 0.01         |              |
| G17                                                                                        | 0.00                                                                                           | 0.01        |                          |              |              |              |
| A18                                                                                        | 0.00                                                                                           | 0.00        | 0.00                     |              |              |              |
| G19                                                                                        | 0.00                                                                                           | 0.00        |                          |              |              |              |
| S20                                                                                        | 0.00                                                                                           | -0.01       | 0.01                     |              |              |              |
| L21                                                                                        | 0.00                                                                                           | 0.00        | 0.02                     | -0.03        | -0.02, 0.02  |              |
| Q22                                                                                        | 0.00                                                                                           | 0.00        | 0.00, 0.00               | 0.00         |              | -0.01, 0.00  |
| P23                                                                                        |                                                                                                | 0.00        | 0.00, 0.00               | -0.01        | 0.00         |              |
| L24                                                                                        | 0.00                                                                                           | -0.01       | 0.00                     | 0.01         | 0.00, -0.01  |              |
| A25                                                                                        | 0.00                                                                                           | 0.00        | 0.00                     |              |              |              |
| L26                                                                                        | -0.01                                                                                          | 0.00        | 0.01                     | 0.03         | 0.01, 0.00   |              |
| E27                                                                                        | 0.01                                                                                           | 0.01        | 0.00 sm, 0.00 sm         | 0.02         |              |              |
| G28                                                                                        | -0.02                                                                                          | 0.00        |                          |              |              |              |
| S29                                                                                        | 0.01                                                                                           | 0.00        | 0.01                     |              |              |              |
| L30                                                                                        | 0.00                                                                                           | -0.01       | -0.01                    | 0.00         | -0.02, 0.03  |              |
| Q31                                                                                        | 0.00                                                                                           | 0.00        | 0.00, 0.00               | 0.01         |              | -0.04, -0.07 |



**Table S6.** Experimental fit parameters from at least three titrations in each buffer.

| Buffer | $n_{\text{ITC}}$ | $K_{\text{ITC}}$        | $\Delta H_{\text{ITC}}$ (kcal mol <sup>-1</sup> ) |
|--------|------------------|-------------------------|---------------------------------------------------|
| MOPS   | $0.8 \pm 0.2$    | $2 (\pm 1) \times 10^6$ | $-1.3 \pm 0.2$                                    |
| MOPSO  | $1.0 \pm 0.1$    | $5 (\pm 2) \times 10^5$ | $-1.31 \pm 0.03$                                  |

**Table S7.** Chemical shifts of assigned proton NMR resonances of apo E3A D4A C-peptide. Solutions were prepared at 1.5 mM peptide in 95:5 (v/v) H<sub>2</sub>O:D<sub>2</sub>O with 10 mM Tris-d<sub>11</sub> at pH 7.4 and spectra were collected at 800 MHz and 10 °C.

| Chemical Shifts of Assigned <sup>1</sup> H NMR Resonances of Apo E3A D4A C-peptide at pH 7.4 |                                |             |            |             |             |             |
|----------------------------------------------------------------------------------------------|--------------------------------|-------------|------------|-------------|-------------|-------------|
| Residue                                                                                      | Chemical Shifts at 10 °C (ppm) |             |            |             |             |             |
|                                                                                              | NH                             | CH $\alpha$ | CH $\beta$ | CH $\gamma$ | CH $\delta$ | NH $\gamma$ |
| E1                                                                                           | 8.04                           | 4.34        | 1.84, 2.03 | 2.31        | -           | -           |
| A2                                                                                           | 8.44                           | 4.31        | 1.38       | -           | -           | -           |
| A3                                                                                           | 8.40                           | 4.28        | 1.37       | -           | -           | -           |
| A4                                                                                           | 8.37                           | 4.31        | 1.36       | -           | -           | -           |
| L5                                                                                           | 8.30                           | 4.31        | 1.62       | 1.56        | 0.89, 0.92  | -           |
| Q6                                                                                           | 8.56                           | 4.25        | 1.98, 2.04 | 2.28        | -           | 6.87, 7.59  |
| V7                                                                                           | 8.31                           | 4.12        | 2.05       | 0.92        | -           | -           |
| G8                                                                                           | 8.66                           | 3.96        | -          | -           | -           | -           |
| Q9                                                                                           | 8.32                           | 4.36        | 2.00, 2.09 | 2.34        | -           | 6.92, 7.67  |
| V10                                                                                          | 8.35                           | 4.09        | 2.06       | 0.94, 0.94  | -           | -           |
| E11                                                                                          | 8.66                           | 4.30        | 1.94, 2.04 | 2.25        | -           | -           |
| L12                                                                                          | 8.54                           | 4.34        | 1.67       | 1.61        | 0.88, 0.92  | -           |
| G13                                                                                          | n.d.                           | n.d.        | -          | -           | -           | -           |
| G14                                                                                          | n.d.                           | n.d.        | -          | -           | -           | -           |
| G15                                                                                          | n.d.                           | n.d.        | -          | -           | -           | -           |
| P16                                                                                          | -                              | n.d.        | n.d.       | n.d.        | n.d.        | -           |
| G17                                                                                          | 8.39                           | 3.98        | -          | -           | -           | -           |
| A18                                                                                          | 8.54                           | 4.25        | 1.37       | -           | -           | -           |
| G19                                                                                          | 8.58                           | 3.97        | -          | -           | -           | -           |
| S20                                                                                          | 8.24                           | 4.45        | 3.87       | -           | -           | -           |
| L21                                                                                          | 8.40                           | 4.37        | 1.63       | 1.61        | 0.88, 0.93  | -           |
| Q22                                                                                          | 8.41                           | 4.61        | 1.93, 2.09 | 2.39        | -           | 6.94, 7.61  |
| P23                                                                                          | -                              | 4.61        | 1.92, 2.39 | 2.09        | 3.65, 3.77  | -           |
| L24                                                                                          | 8.35                           | 4.32        | 1.63       | 1.58        | 0.95, 0.95  | -           |
| A25                                                                                          | 8.27                           | 4.30        | 1.40       | -           | -           | -           |
| L26                                                                                          | 8.42                           | 4.28        | 1.63       | 1.58        | 0.91, 0.93  | -           |
| E27                                                                                          | 8.47                           | 4.37        | 1.97, 2.09 | 2.35        | -           | -           |
| G28                                                                                          | 8.61                           | 3.98        | -          | -           | -           | -           |
| S29                                                                                          | 8.20                           | 4.44        | 3.86       | -           | -           | -           |
| L30                                                                                          | 8.45                           | 4.38        | 1.66       | 1.66        | 0.88, 0.93  | -           |
| Q31                                                                                          | 7.99                           | 4.15        | 1.9, 2.11  | 2.28        | -           | 6.87, 7.59  |

**Table S8.** Chemical shifts of assigned proton NMR resonances of Cu(II)-bound E3A D4A C-peptide. Solutions were prepared at 1.5 mM peptide in 95:5 (v/v) H<sub>2</sub>O:D<sub>2</sub>O with 10 mM Tris-d<sub>11</sub> at pH 7.4 and spectra were collected at 800 MHz and 10 °C.

| Chemical Shifts of Assigned <sup>1</sup> H NMR Resonances of Cu(II)/E3A D4A C-peptide at pH 7.4 |                                |             |            |             |             |             |
|-------------------------------------------------------------------------------------------------|--------------------------------|-------------|------------|-------------|-------------|-------------|
| Residue                                                                                         | Chemical Shifts at 10 °C (ppm) |             |            |             |             |             |
|                                                                                                 | NH                             | CH $\alpha$ | CH $\beta$ | CH $\gamma$ | CH $\delta$ | NH $\gamma$ |
| E1                                                                                              | 8.05                           | 4.34        | 1.84, 2.04 | 2.32        | -           | -           |
| A2                                                                                              | 8.45                           | 4.30        | 1.35       | -           | -           | -           |
| A3                                                                                              | 8.40                           | 4.27        | 1.37       | -           | -           | -           |
| A4                                                                                              | 8.37                           | 4.31        | 1.37       | -           | -           | -           |
| L5                                                                                              | 8.27                           | 4.31        | 1.63       | 1.56        | 0.92, 0.92  | -           |
| Q6                                                                                              | 8.56                           | 4.25        | 2.00, 2.05 | 2.29        | -           | n.d.        |
| V7                                                                                              | 8.32                           | 4.12        | 2.05       | 0.92        | -           | -           |
| G8                                                                                              | 8.67                           | 3.96        | -          | -           | -           | -           |
| Q9                                                                                              | 8.30 and 8.32                  | 4.35        | 2.00, 2.09 | 2.34        | -           | n.d.        |
| V10                                                                                             | 8.34                           | 4.10        | 2.05       | 0.92        | -           | -           |
| E11                                                                                             | 8.66                           | 4.30        | 1.94, 2.03 | 2.28        | -           | -           |
| L12                                                                                             | 8.54                           | 4.34        | 1.67       | 1.61        | 0.90, 0.90  | -           |
| G13                                                                                             | n.d.                           | n.d.        | -          | -           | -           | -           |
| G14                                                                                             | n.d.                           | n.d.        | -          | -           | -           | -           |
| G15                                                                                             | n.d.                           | n.d.        | -          | -           | -           | -           |
| P16                                                                                             | -                              | n.d.        | n.d.       | n.d.        | n.d.        | -           |
| G17                                                                                             | 8.40                           | 3.98        | -          | -           | -           | -           |
| A18                                                                                             | 8.50                           | 4.37        | 1.38       | -           | -           | -           |
| G19                                                                                             | 8.56                           | 3.97        | -          | -           | -           | -           |
| S20                                                                                             | 8.24                           | 4.45        | 3.87       | -           | -           | -           |
| L21                                                                                             | 8.40                           | 4.37        | 1.62       | 1.62        | 0.89, 0.94  | -           |
| Q22                                                                                             | 8.41                           | 4.60        | 1.94, 2.09 | 2.39        | -           | 6.94, 7.61  |
| P23                                                                                             | -                              | n.d.        | n.d.       | n.d.        | n.d.        | -           |
| L24                                                                                             | 8.35                           | 4.32        | 1.62       | 1.62        | 0.93, 0.93  | -           |
| A25                                                                                             | 8.27                           | 4.31        | 1.41       | -           | -           | -           |
| L26                                                                                             | 8.42                           | 4.28        | 1.64       | 1.58        | 0.91, 0.94  | -           |
| E27                                                                                             | 8.48                           | 4.38        | 1.97, 2.09 | 2.37        | -           | -           |
| G28                                                                                             | 8.59                           | 3.97        | -          | -           | -           | -           |
| S29                                                                                             | 8.20                           | 4.44        | 3.87       | -           | -           | -           |
| L30                                                                                             | 8.45                           | 4.40        | 1.66       | 1.66        | 0.89, 0.93  | -           |
| Q31                                                                                             | 7.99                           | 4.15        | 1.92, 2.13 | 2.28        | -           | n.d.        |

**Table S9.**  $\Delta\delta$  of assigned proton NMR resonances of Cu(II)-bound E3A D4A C-peptide and apo E3A D4A C-peptide. Solutions were prepared at 1.5 mM peptide in 95:5 (v/v) H<sub>2</sub>O:D<sub>2</sub>O with 10 mM Tris-d<sub>11</sub> at pH 7.4 and spectra were collected at 800 MHz and 10 °C. Visual representations shown in Figures S11 and S12.

| $\Delta\delta$ of the Assigned <sup>1</sup> H NMR Resonances of Cu(II)/E3A D4A C-peptide at pH 7.4 |                                                                                                |             |             |              |              |             |
|----------------------------------------------------------------------------------------------------|------------------------------------------------------------------------------------------------|-------------|-------------|--------------|--------------|-------------|
| Residue                                                                                            | $\Delta\delta = \delta(\text{Cu(II)/C-peptide}) - \delta(\text{apo C-peptide})$ at 10 °C (ppm) |             |             |              |              |             |
|                                                                                                    | NH                                                                                             | CH $\alpha$ | CH $\beta$  | CH $\gamma$  | CH $\delta$  | NH $\gamma$ |
| E1                                                                                                 | 0.01                                                                                           | 0.00        | 0.00, 0.01  | 0.01         | -            | -           |
| A2                                                                                                 | 0.01                                                                                           | -0.01       | -0.03       | -            | -            | -           |
| A3                                                                                                 | 0.00                                                                                           | -0.01       | 0.00        | -            | -            | -           |
| A4                                                                                                 | 0.00                                                                                           | 0.00        | 0.01        | -            | -            | -           |
| L5                                                                                                 | -0.03                                                                                          | 0.00        | 0.01        | 0.00         | 0.03, 0.00   | -           |
| Q6                                                                                                 | 0.00                                                                                           | 0.00        | 0.02, 0.01  | 0.01         | -            | n.d.        |
| V7                                                                                                 | 0.01                                                                                           | 0.00        | 0.00        | 0.00         | -            | -           |
| G8                                                                                                 | 0.01                                                                                           | 0.00        | -           | -            | -            | -           |
| Q9                                                                                                 | -0.02 and 0.00                                                                                 | -0.01       | 0.00, 0.00  | 0.00         | -            | n.d.        |
| V10                                                                                                | -0.01                                                                                          | 0.01        | -0.01       | -0.02, -0.02 | -            | -           |
| E11                                                                                                | 0.00                                                                                           | 0.00        | 0.00, -0.01 | 0.03         | -            | -           |
| L12                                                                                                | 0.00                                                                                           | 0.00        | 0.00        | 0.00         | 0.02, -0.02  | -           |
| G13                                                                                                | n.d.                                                                                           | n.d.        | -           | -            | -            | -           |
| G14                                                                                                | n.d.                                                                                           | n.d.        | -           | -            | -            | -           |
| G15                                                                                                | n.d.                                                                                           | n.d.        | -           | -            | -            | -           |
| P16                                                                                                | -                                                                                              | n.d.        | n.d.        | n.d.         | n.d.         | -           |
| G17                                                                                                | 0.01                                                                                           | 0.00        | -           | -            | -            | -           |
| A18                                                                                                | -0.04                                                                                          | 0.12        | 0.01        | -            | -            | -           |
| G19                                                                                                | -0.02                                                                                          | 0.00        | -           | -            | -            | -           |
| S20                                                                                                | 0.00                                                                                           | 0.00        | 0.00        | -            | -            | -           |
| L21                                                                                                | 0.00                                                                                           | 0.00        | -0.01       | 0.01         | 0.01, 0.01   | -           |
| Q22                                                                                                | 0.00                                                                                           | -0.01       | 0.01, 0.00  | 0.00         | -            | 0.00, 0.00  |
| P23                                                                                                | -                                                                                              | n.d.        | n.d.        | n.d.         | n.d.         | -           |
| L24                                                                                                | 0.00                                                                                           | 0.00        | -0.01       | 0.04         | -0.02, -0.02 | -           |
| A25                                                                                                | 0.00                                                                                           | 0.01        | 0.01        | -            | -            | -           |
| L26                                                                                                | 0.00                                                                                           | 0.00        | 0.01        | 0.00         | 0.00, 0.01   | -           |
| E27                                                                                                | 0.01                                                                                           | 0.01        | 0.00, 0.00  | 0.02         | -            | -           |
| G28                                                                                                | -0.02                                                                                          | -0.01       | -           | -            | -            | -           |
| S29                                                                                                | 0.00                                                                                           | 0.00        | 0.01        | -            | -            | -           |
| L30                                                                                                | 0.00                                                                                           | 0.02        | 0.00        | 0.00         | 0.01, 0.00   | -           |
| Q31                                                                                                | 0.00                                                                                           | 0.00        | 0.02, 0.02  | 0.00         | -            | n.d.        |

**Table S10.** ITC experimental fit parameters from 1.0 mM Cu(II) titrated into 100  $\mu$ M peptide in 15 mM buffer, pH 7.4 at 25 °C. Titrations were in triplicate for all WT C-peptide, N-term, and C-term, and in duplicate for E3A/D4A C-peptide. The data show that E3A/D4A C-peptide has a smaller  $n_{\text{ITC}}$  indicating 1:2 Cu(II):peptide stoichiometry and that C-term has a smaller  $K_{\text{ITC}}$  than the other peptides.

| Variant | Buffer | $n_{\text{ITC}}$ | $K_{\text{ITC}}$            | $\Delta H_{\text{ITC}}$<br>(kcal mol <sup>-1</sup> ) | $K_{\text{Cu(II)/C-peptide}}$ | $\Delta H_{\text{Cu(II)/C-peptide}}$<br>(kcal mol <sup>-1</sup> ) |
|---------|--------|------------------|-----------------------------|------------------------------------------------------|-------------------------------|-------------------------------------------------------------------|
| WT      | MOPS   | $0.8 \pm 0.2$    | $2 (\pm 1) \times 10^6$     | $-1.3 \pm 0.2$                                       | $2 (\pm 1) \times 10^8$       | $-2 \pm 1$                                                        |
|         | MOPSO  | $1.0 \pm 0.1$    | $5 (\pm 2) \times 10^5$     | $-1.31 \pm 0.03$                                     | $6 (\pm 3) \times 10^7$       | $-2 \pm 1$                                                        |
| E3A/D4A | MOPS   | $0.5 \pm 0.2$    | $1 (\pm 0.6) \times 10^6$   | $-1.8 \pm 0.2$                                       | $9 (\pm 6) \times 10^7$       | $-3 \pm 1$                                                        |
|         | MOPSO  | $0.55 \pm 0.07$  | $4 (\pm 1) \times 10^5$     | $-1.80 \pm 0.09$                                     | $4 (\pm 1) \times 10^7$       | $-2.8 \pm 0.8$                                                    |
| N-term  | MOPS   | $0.6 \pm 0.2$    | $2.0 (\pm 0.7) \times 10^6$ | $-1.1 \pm 0.4$                                       | n.d.                          | n.d.                                                              |
| C-term  | MOPS   | $0.7 \pm 0.1$    | $3 (\pm 1) \times 10^5$     | $-1.28 \pm 0.06$                                     | n.d.                          | n.d.                                                              |

**Scheme S1.** Determination of  $\Delta H_{\text{Cu(II)-MOPSO}}$ . Titrations of 1.0 mM Cu(II) into 100  $\mu\text{M}$  EDTA in 15 mM MOPSO, pH 7.4 with fit parameters from three experiments:  $n_{\text{ITC}} = 0.91 \pm 0.09$ ;  $K_{\text{ITC}} = 4 (\pm 1) \times 10^7$ ;  $\Delta H_{\text{ITC}} = -7.5 \pm 0.9 \text{ kcal mol}^{-1}$ .  $\Delta H_{\text{Cu(II)-MOPSO}}$  is found to be  $-1.4 \text{ kcal mol}^{-1}$ . All  $\Delta H$  values are found in NIST.<sup>3</sup> All competing equilibria are accounted for as described by Grosseohme *et al.*<sup>1</sup>

| Equilibria                                                     | n    | $\Delta H (\text{kcal mol}^{-1})$ | $n \times \Delta H (\text{kcal mol}^{-1})$ |
|----------------------------------------------------------------|------|-----------------------------------|--------------------------------------------|
| $\text{Cu(II)-MOPSO} \rightarrow \text{Cu(II)} + \text{MOPSO}$ | 1    | -X                                | -X                                         |
| $\text{EDTA-2H}^+ \rightarrow \text{EDTA-H}^+ + \text{H}^+$    | 0.05 | 4.2                               | 0.2142                                     |
| $\text{EDTA-H}^+ \rightarrow \text{EDTA} + \text{H}^+$         | 0.99 | 5.6                               | 5.544                                      |
| $\text{MOPSO} + \text{H}^+ \rightarrow \text{MOPSO-H}^+$       | 1.04 | -6.19                             | -6.4376                                    |
| $\text{Cu(II)} + \text{EDTA} \rightarrow \text{Cu(II)-EDTA}$   | 1    | -8.2                              | -8.2                                       |

---

$\Delta H_{\text{ITC}} = -X - 8.8794$   
 $X = -\Delta H_{\text{ITC}} - 8.8794$   
 $X = \Delta H_{\text{Cu(II)-MOPSO}} = -1.364$

## References

- (1) Grosseohme, N. E.; Spuches, A. M.; Wilcox, D. E. Application of Isothermal Titration Calorimetry in Bioinorganic Chemistry. *J. Biol. Inorg. Chem.* **2010**, *15* (8), 1183–1191. <https://doi.org/10.1007/s00775-010-0693-3>.
- (2) Peisach, J.; Blumberg, W. E. Structural Implications Derived from the Analysis of Electron Paramagnetic Resonance Spectra of Natural and Artificial Copper Proteins. *Arch. Biochem. Biophys.* **1974**, *165* (2), 691–708. [https://doi.org/Doi: 10.1016/0003-9861\(74\)90298-7](https://doi.org/Doi: 10.1016/0003-9861(74)90298-7).
- (3) NIST Critically Selected Stability Constants of Metal Complexes, Version 8.0.
